# Supplementary material
Source: PubMed Central journal article supplement (PMC7539299)
Supplement: mp0c00630_si_001.pdf [file mp0c00630_si_001.pdf]

## SUPPORTING INFORMATION

### Addressing the Biochemical Foundations of a Glucose-Based “Trojan Horse”– Strategy to Boron Neutron Capture Therapy: From Chemical Synthesis to *In* *Vitro* Assessment

Jelena Matović,<sup>1,ϕ</sup> Juulia Järvinen,<sup>2,ϕ</sup> Helena C. Bland,<sup>1</sup> Iris K. Sokka,<sup>1</sup> Surachet Imlimthan,<sup>1</sup> Ruth Mateu Ferrando,<sup>1</sup> Kristiina M. Huttunen,<sup>2</sup> Juri Timonen,<sup>2</sup> Sirpa Peräniemi,<sup>2</sup> Olli Aitio,<sup>3</sup> Anu J. Airaksinen,<sup>1,4</sup> Mirikka Sarparanta,<sup>1</sup> Mikael P. Johansson,<sup>1,5</sup> Jarkko Rautio<sup>2</sup> and Filip S. Ekholm<sup>1\*</sup>

<sup>1</sup> Department of Chemistry, University of Helsinki, Finland, P.O. Box 55, 00014 Helsinki, Finland

<sup>2</sup> School of Pharmacy, University of Eastern Finland, P.O. Box 1627, 70211 Kuopio, Finland

<sup>3</sup> Glykos Finland Ltd., Viikinkaari 6, 00790 Helsinki, Finland

<sup>4</sup> Turku PET Centre, Department of Chemistry, University of Turku, P.O. Box 52, 20521 Turku, Finland

<sup>5</sup> Helsinki Institute of Sustainability Science, HELSUS, FI-00014 Helsinki, Finland

<sup>ϕ</sup> Equal contributions

**Contact:** filip.ekholm@helsinki.fi

## Table of contents

|                                                                                                          |    |
|----------------------------------------------------------------------------------------------------------|----|
| 1. Additional synthetic routes .....                                                                     | 2  |
| 2. NMR spectra of synthesized compounds .....                                                            | 3  |
| 3. Docking results and Ligand PDBQT files.....                                                           | 24 |
| 4. Characterization of the GLUT1 function and additional details related to affinity/uptake studies..... | 37 |

### 1. Additional synthetic routes

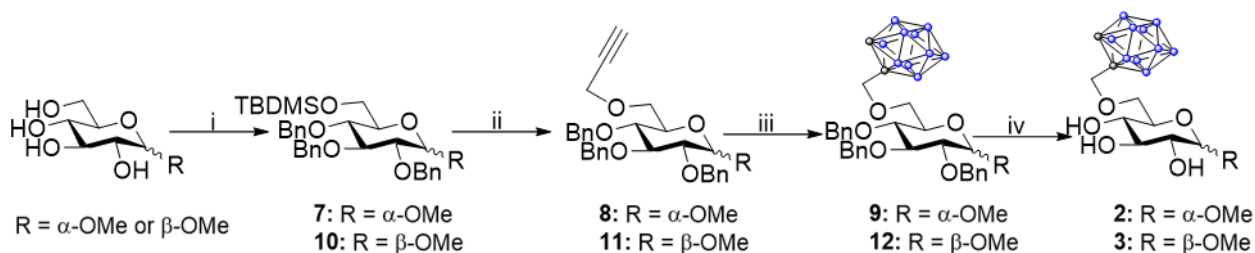

**Supplementary scheme 1.** Overview of reactions of Methyl  $\alpha$ - and  $\beta$ -D-glucopyranosides: i) 1) TBDMSCl, imidazole, DMF, rt, 24 h, 80 % ( $\alpha$ -OMe); 83 % ( $\beta$ -OMe); 2) BnBr, NaH, DMF, rt, 4 h, 78 % (**7**); 80 % (**10**). ii) 1) HF-pyridine, THF, rt, 18 h, 82 % ( $\alpha$ -OMe); 89 % ( $\beta$ -OMe); 2) propargyl bromide, NaH, DMF, rt, 15 h, 89 % (**8**); 95 % (**11**); iii) a) B<sub>10</sub>H<sub>14</sub>, acetonitrile, 60 °C, 1 h; b) **8** or **11** toluene, 80 °C, 22 h, 53 % (**9**); 66 % (**12**); iv) H<sub>2</sub>, 10 % Pd/C, EtOAc:MeOH 7:1, 3–5 bar, rt, 4–6 h, 72 % (**2**); 81 % (**3**).

## 2. NMR spectra of synthesized compounds

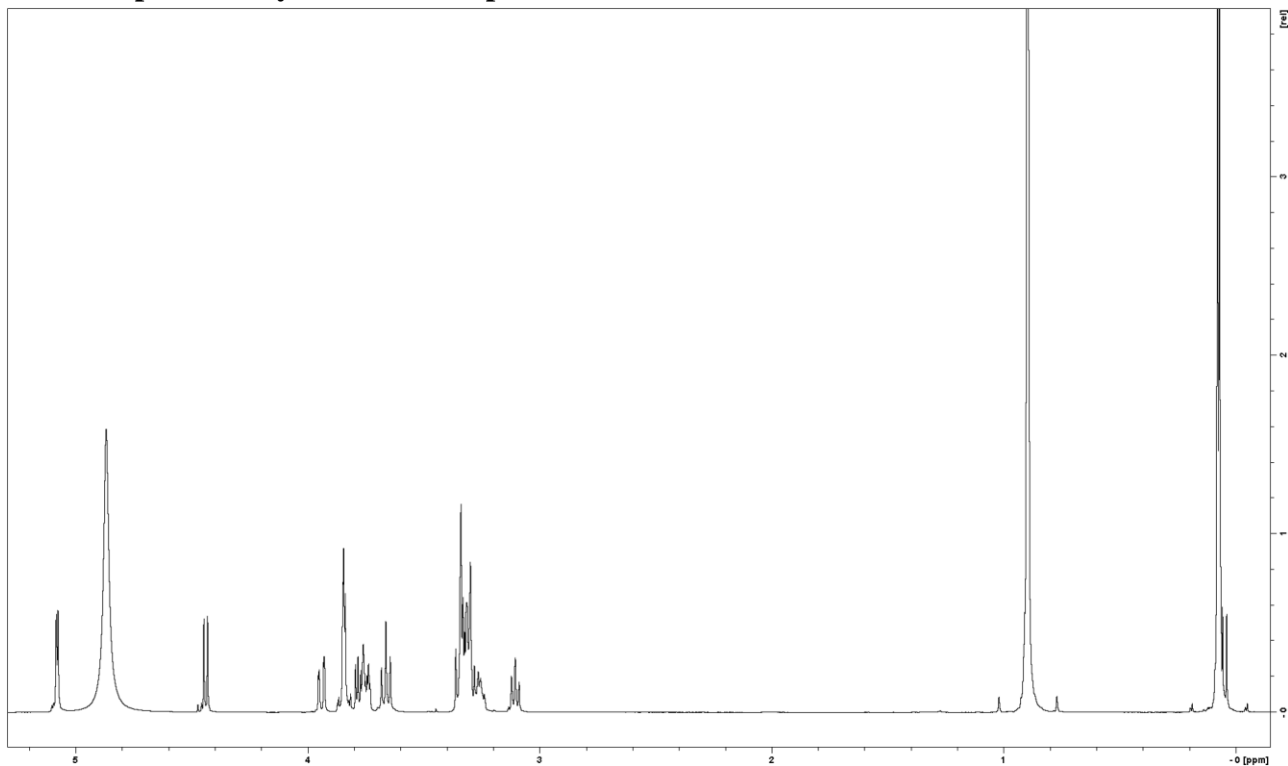

**Supplementary figure 1.** <sup>1</sup>H NMR spectrum of 6-*O*-(tert-butyldimethylsilyl)-D-glucopyranose (500.13 MHz, 23 °C, CD<sub>3</sub>OD).

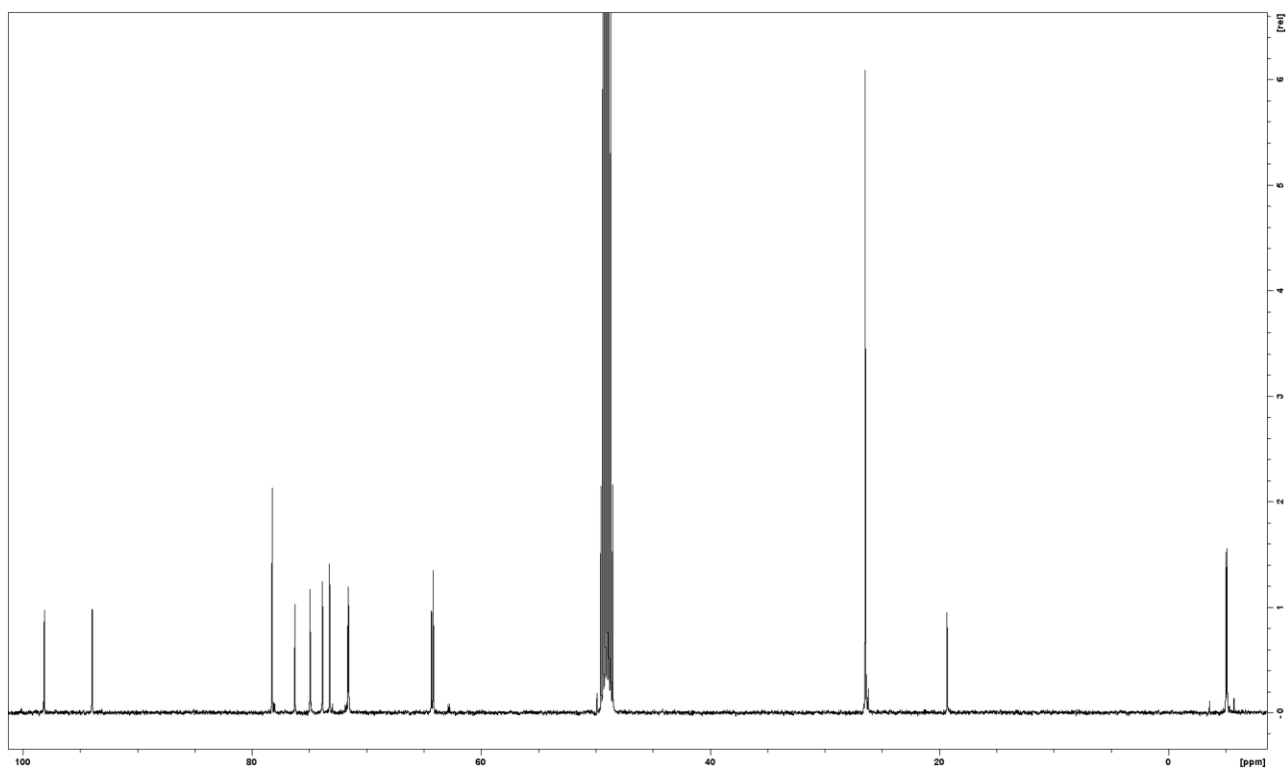

**Supplementary figure 2.** <sup>13</sup>C NMR spectrum of 6-*O*-(tert-butyldimethylsilyl)-D-glucopyranose (125.76 MHz, 23 °C, CD<sub>3</sub>OD).

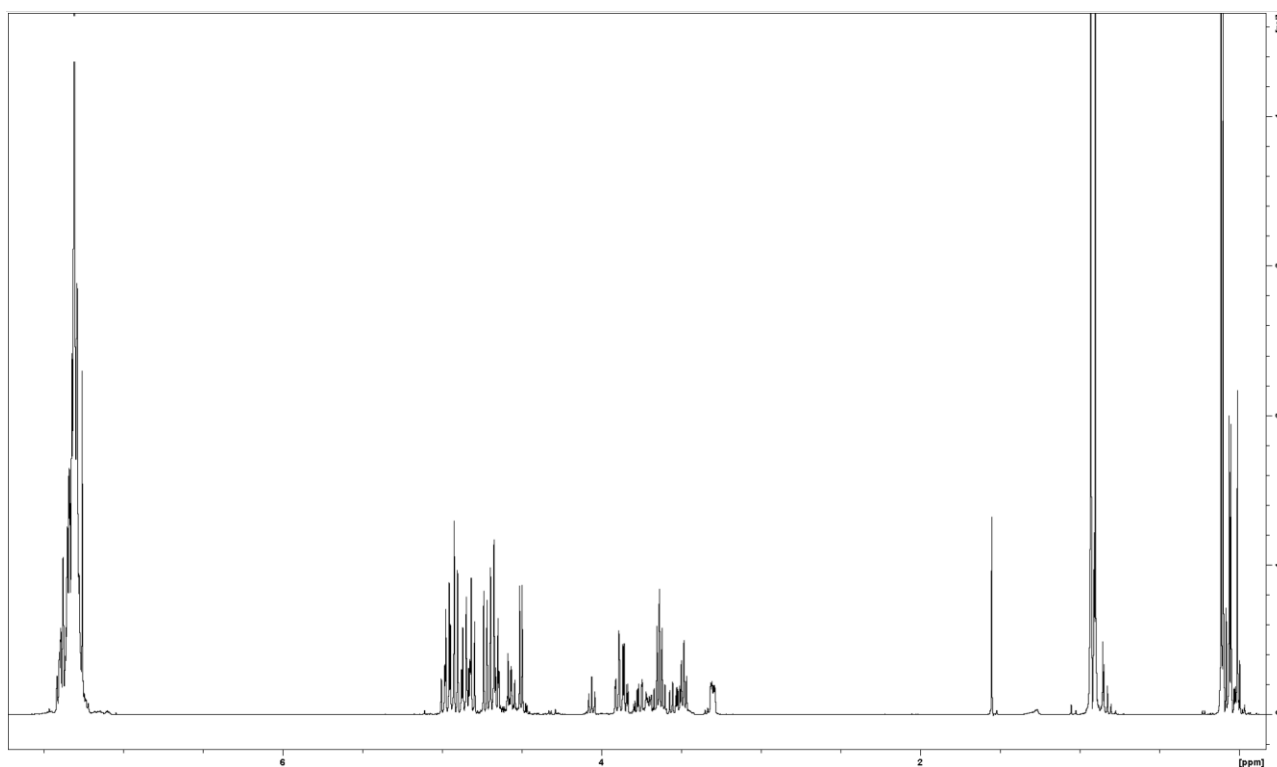

**Supplementary figure 3.**  $^1\text{H}$  NMR spectrum of **4** (500.13 MHz, 23 °C,  $\text{CDCl}_3$ ).

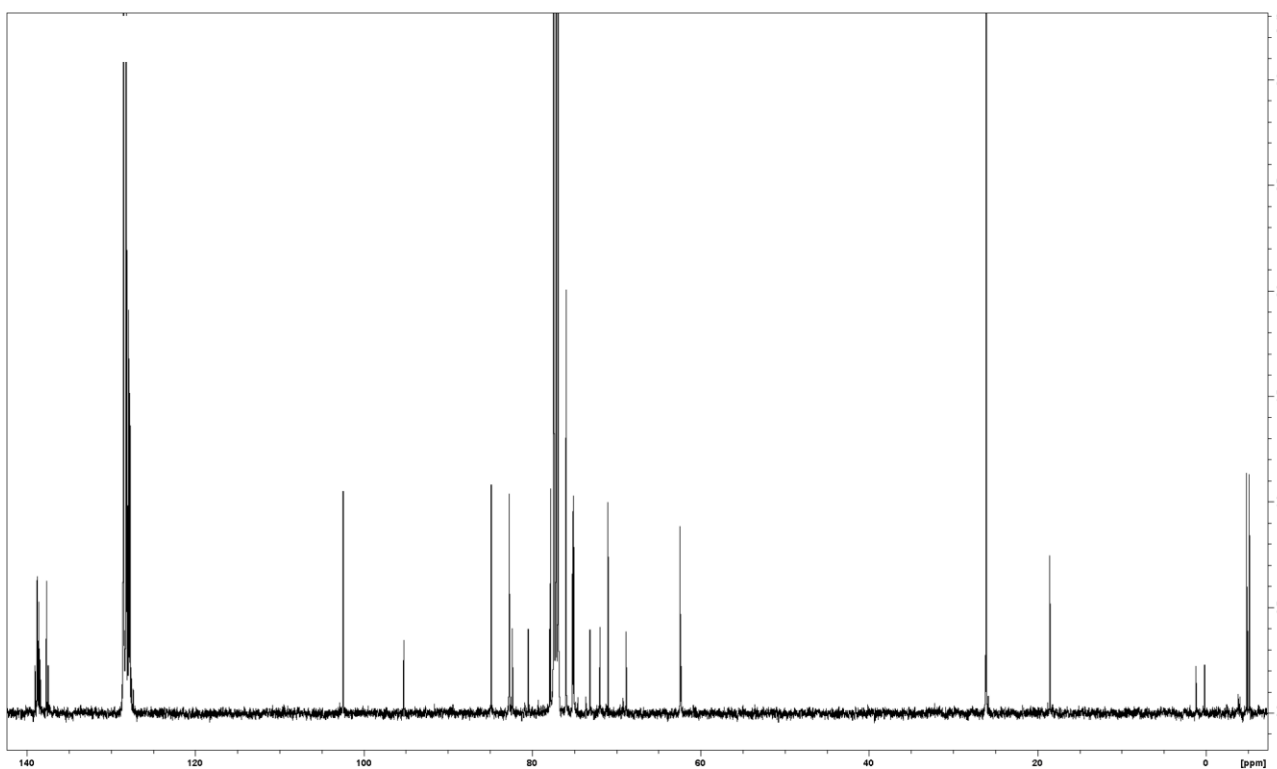

**Supplementary figure 4.**  $^{13}\text{C}$  NMR spectrum of **4** (125.76 MHz, 23 °C,  $\text{CDCl}_3$ ).

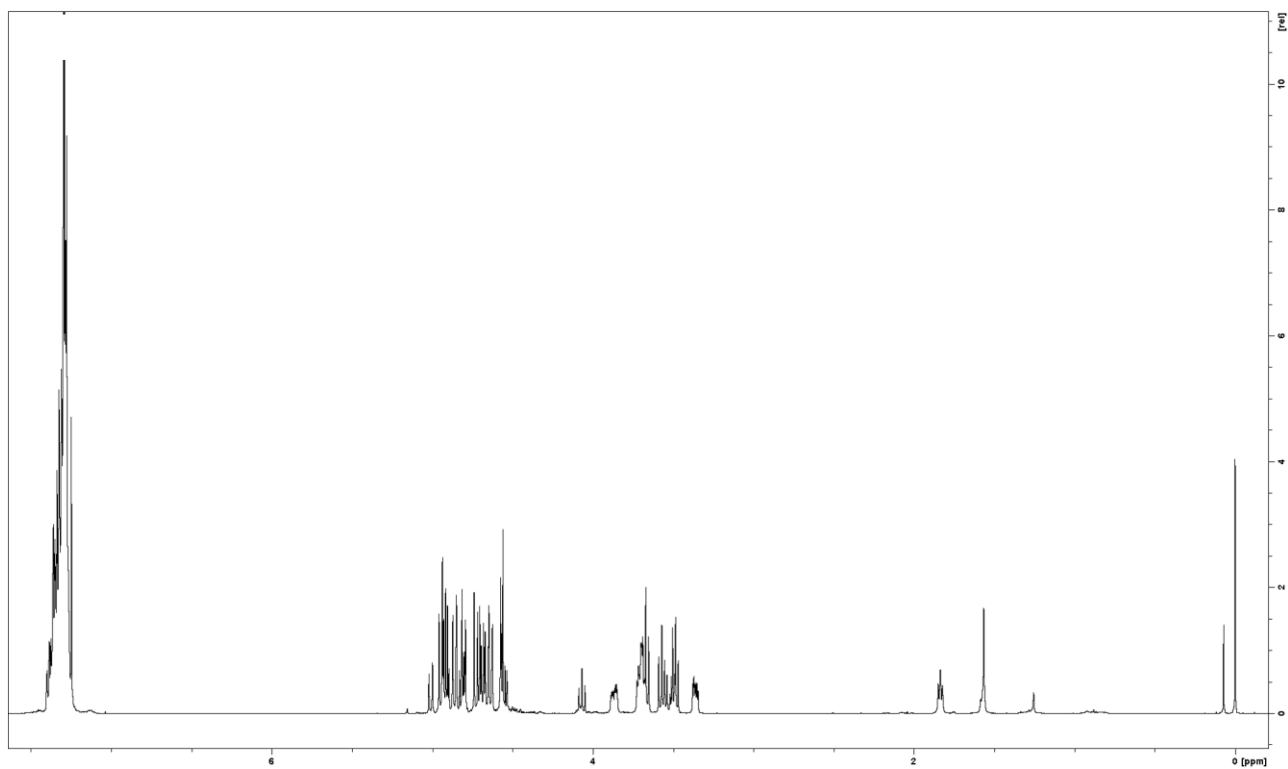

**Supplementary figure 5.** <sup>1</sup>H NMR spectrum of 1,2,3,4-tetra-*O*-benzyl-D-glucopyranose (500.13 MHz, 23 °C, CDCl<sub>3</sub>).

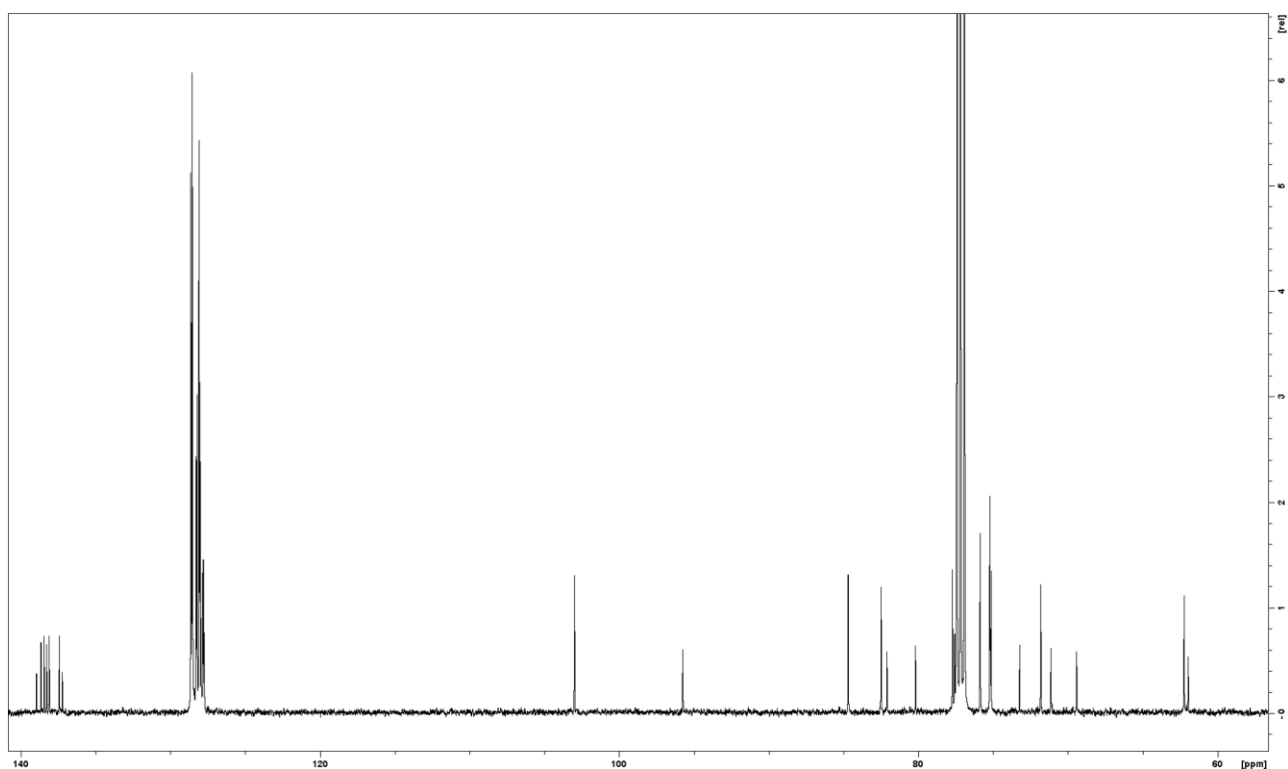

**Supplementary figure 6.** <sup>13</sup>C NMR spectrum of 1,2,3,4-tetra-*O*-benzyl-D-glucopyranose (125.76 MHz, 23 °C, CDCl<sub>3</sub>).

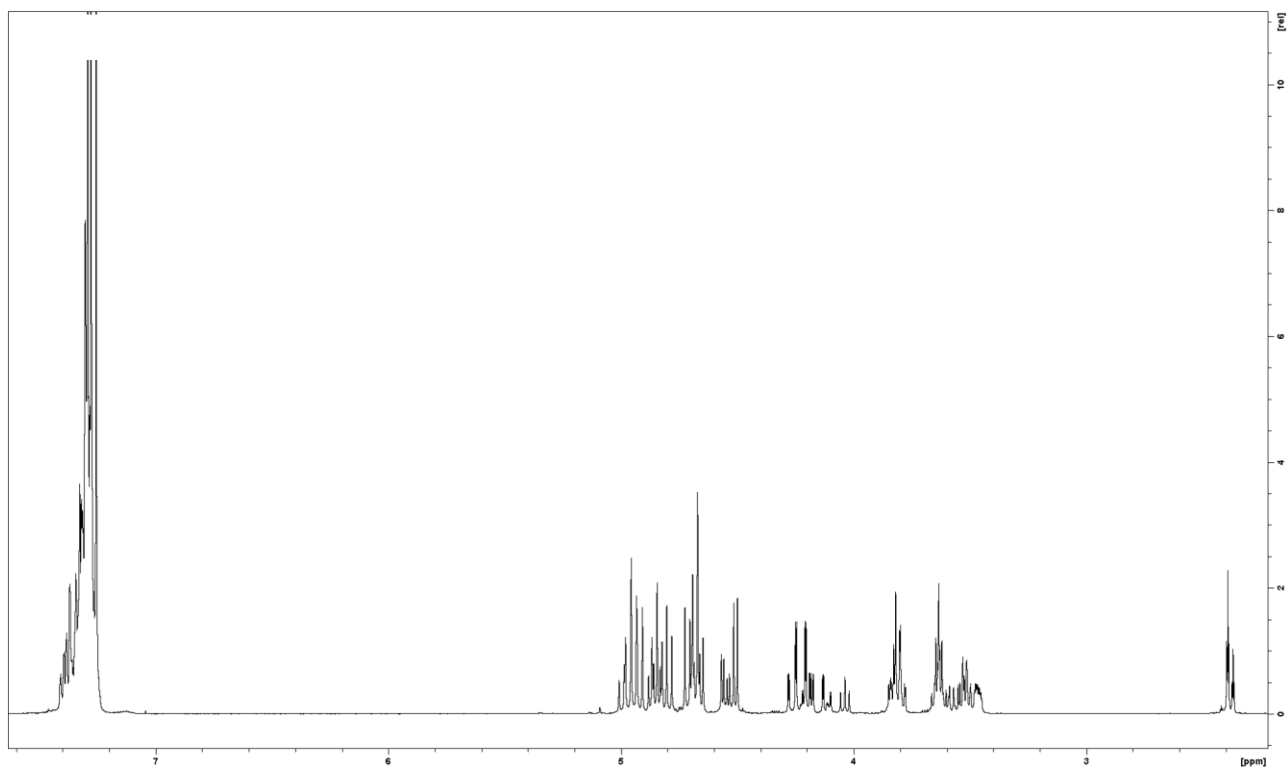

Supplementary figure 7.  $^1\text{H}$  NMR spectrum of **5** (500.13 MHz, 23 °C,  $\text{CDCl}_3$ ).

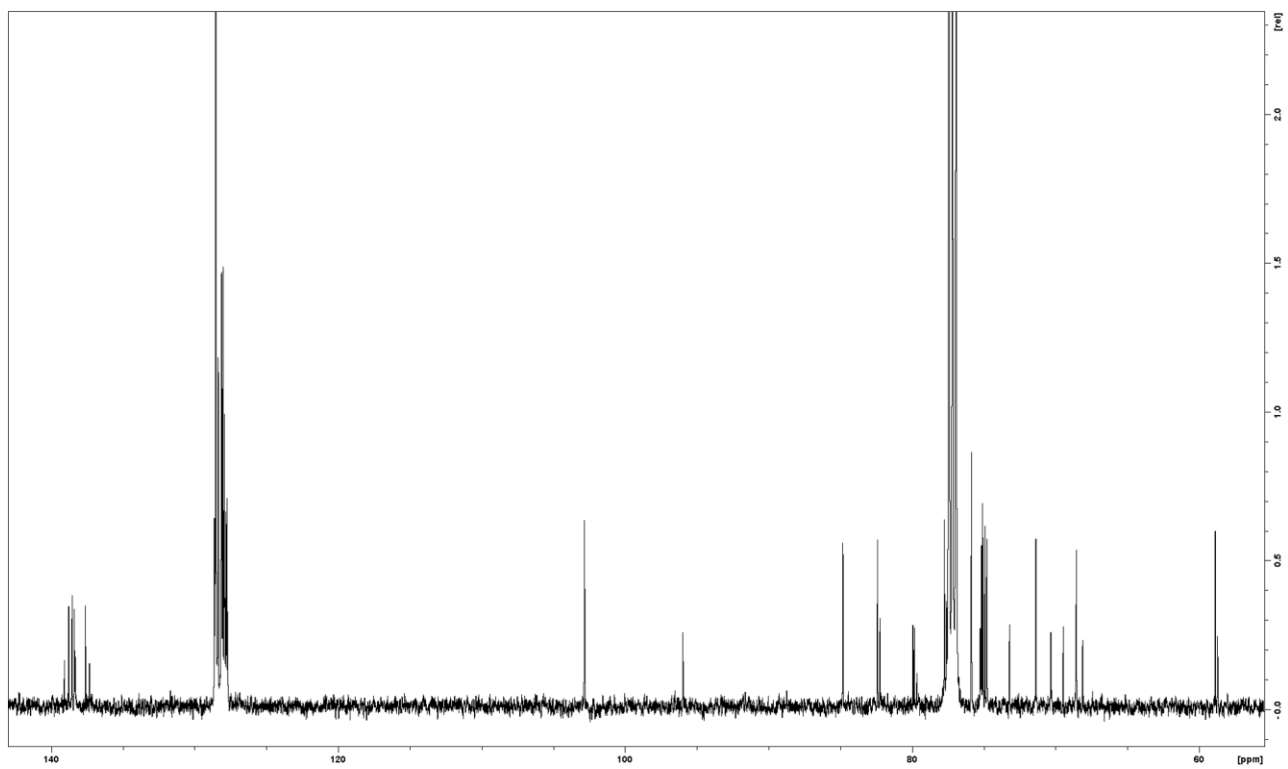

Supplementary figure 8.  $^{13}\text{C}$  NMR spectrum of **5** (125.76 MHz, 23 °C,  $\text{CDCl}_3$ ).

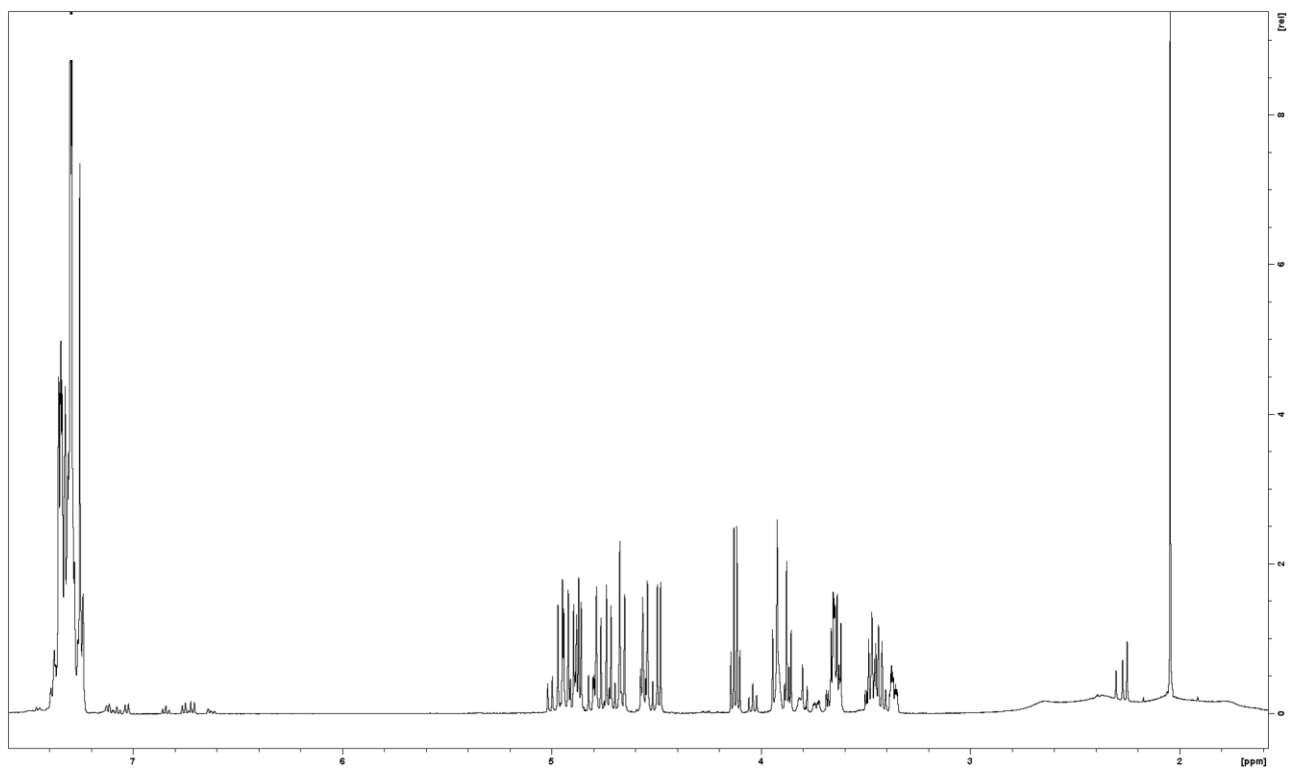

**Supplementary figure 9.**  $^1\text{H}$  NMR spectrum of **6** (500.13 MHz, 23 °C,  $\text{CDCl}_3$ ).

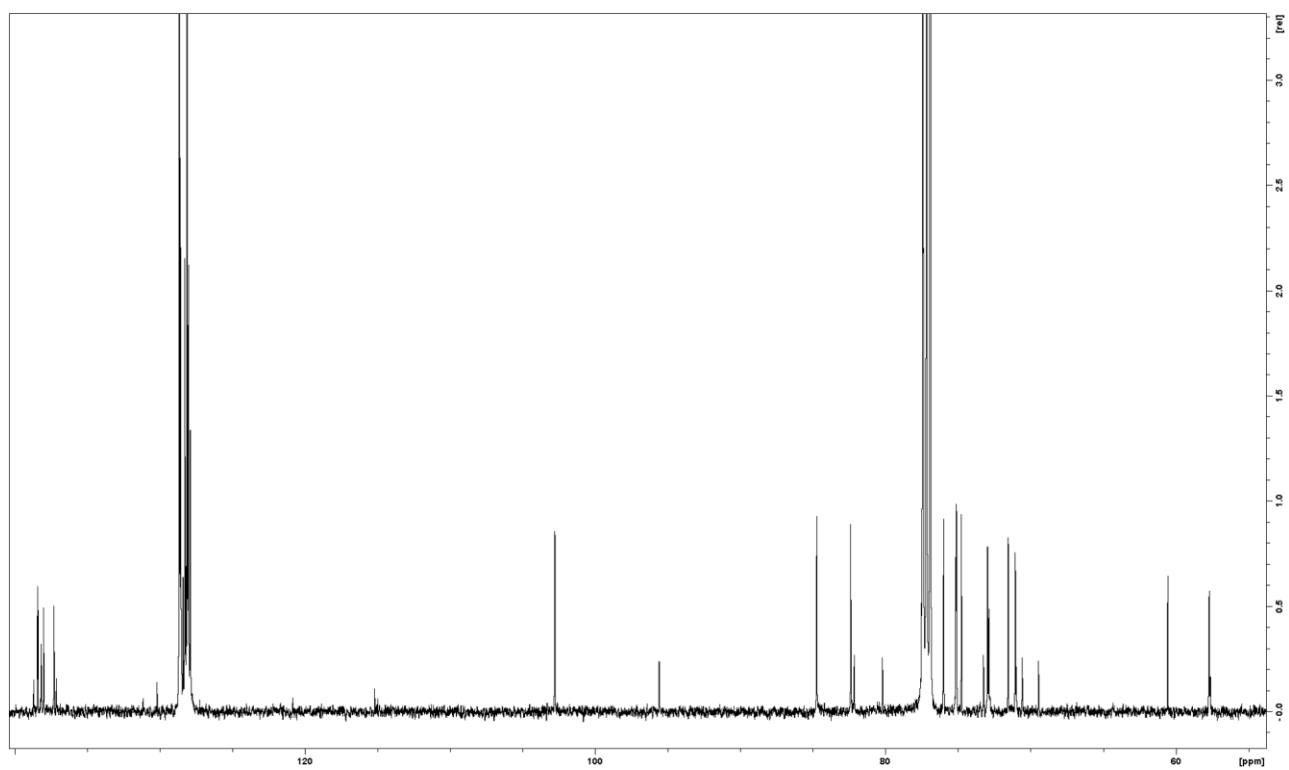

**Supplementary figure 10.**  $^{13}\text{C}$  NMR spectrum of **6** (125.76 MHz, 23 °C,  $\text{CDCl}_3$ ).

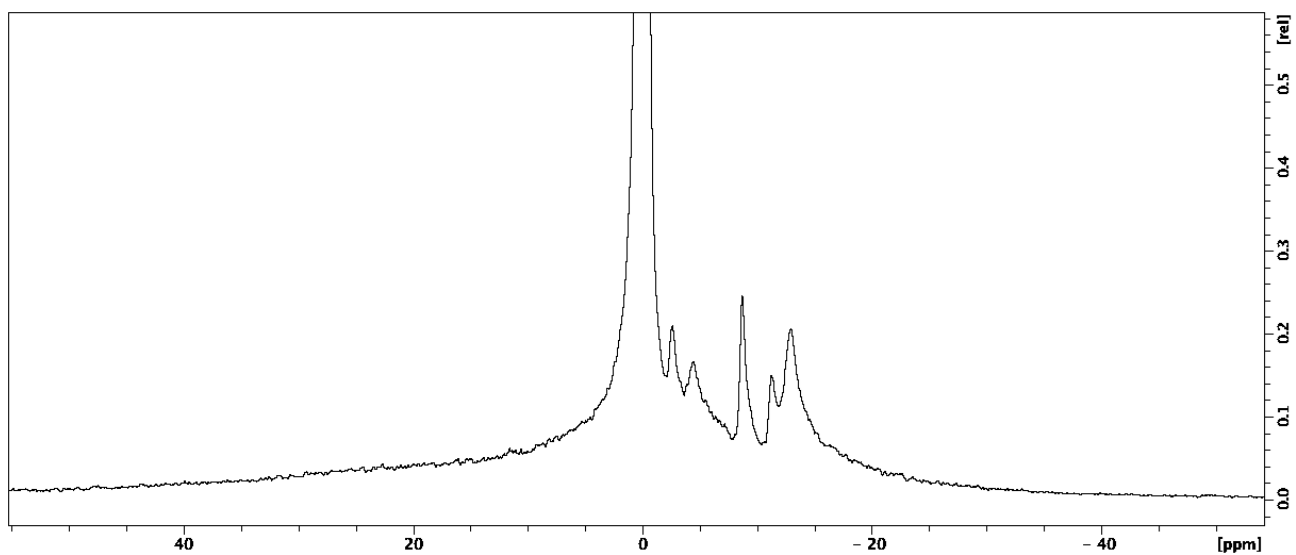

**Supplementary figure 11.**  $^{11}\text{B}$  NMR spectrum of **6** (160.46 MHz, 23 °C,  $\text{CDCl}_3$ ).

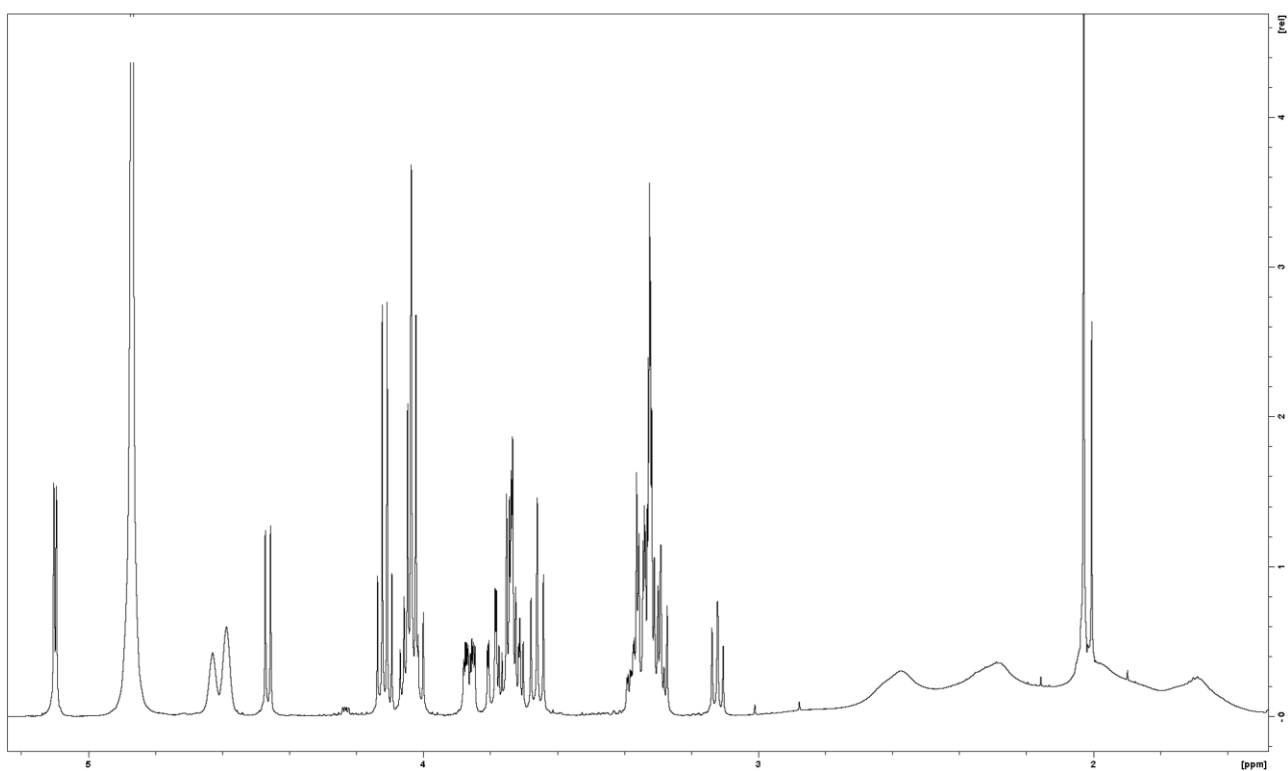

**Supplementary figure 12.**  $^1\text{H}$  NMR spectrum of **1** (500.13 MHz, 23 °C,  $\text{CD}_3\text{OD}$ ).



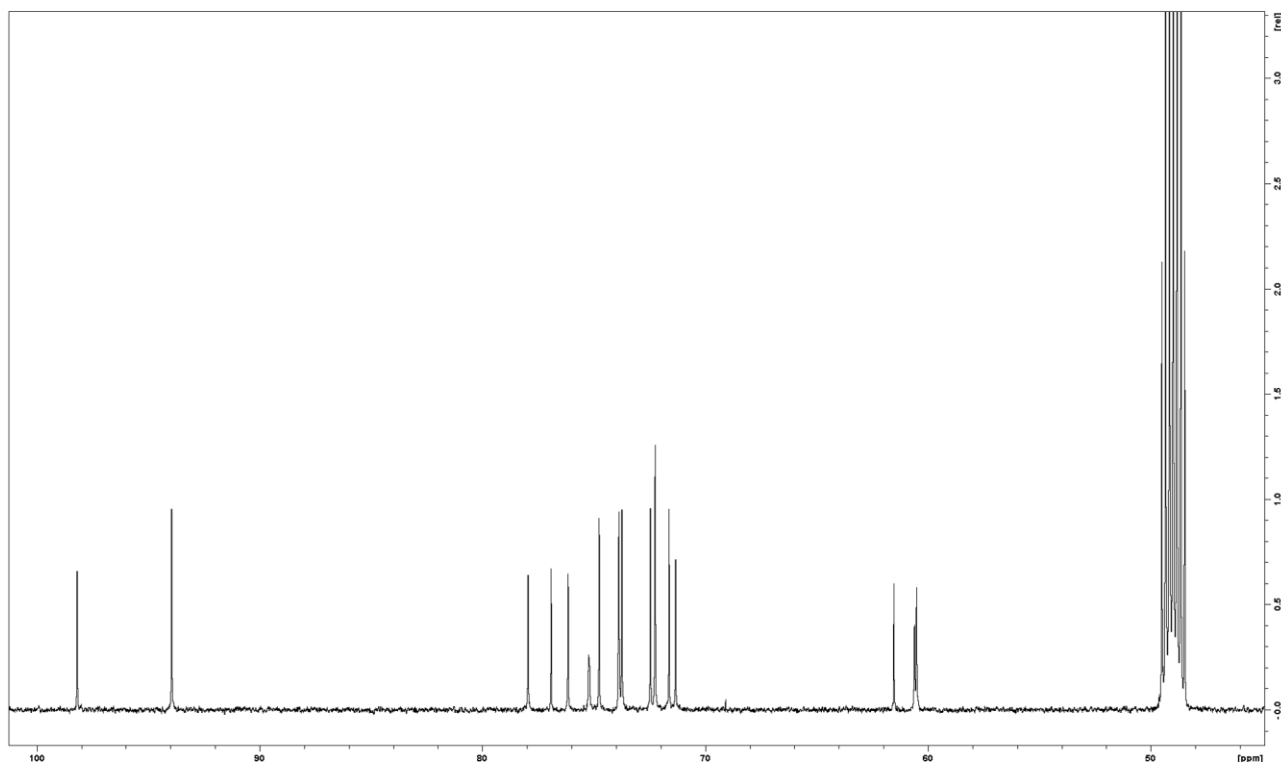

**Supplementary figure 13.**  $^{13}\text{C}$  NMR spectrum of **1** (125.76 MHz, 23 °C,  $\text{CD}_3\text{OD}$ ).

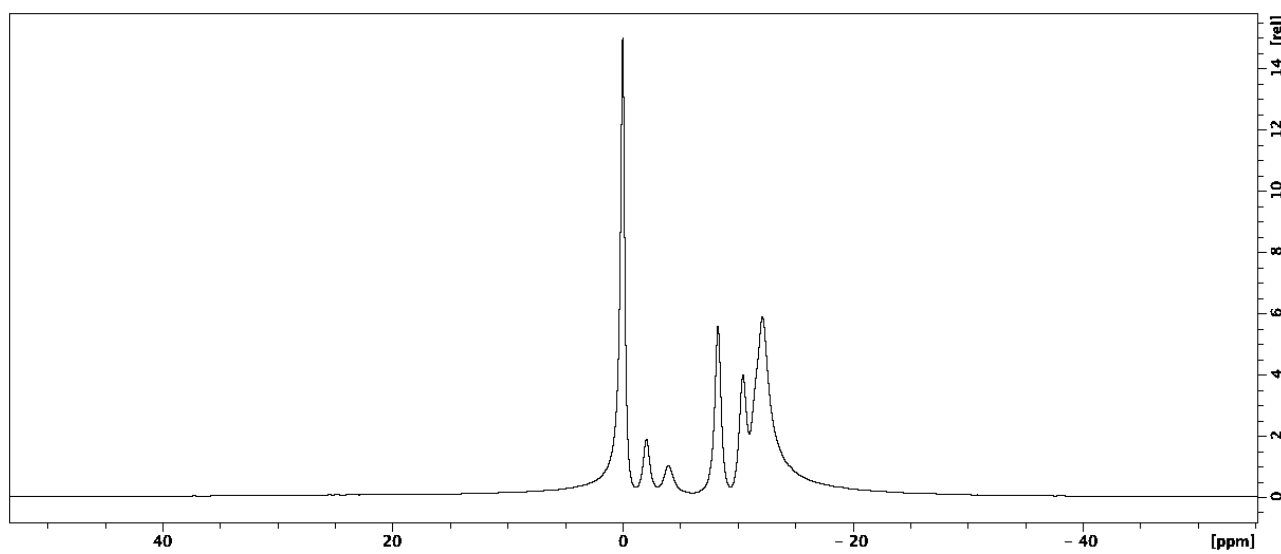

**Supplementary figure 14.**  $^{11}\text{B}$  NMR spectrum of **1** (160.46 MHz, 23 °C,  $\text{CD}_3\text{OD}$ ).

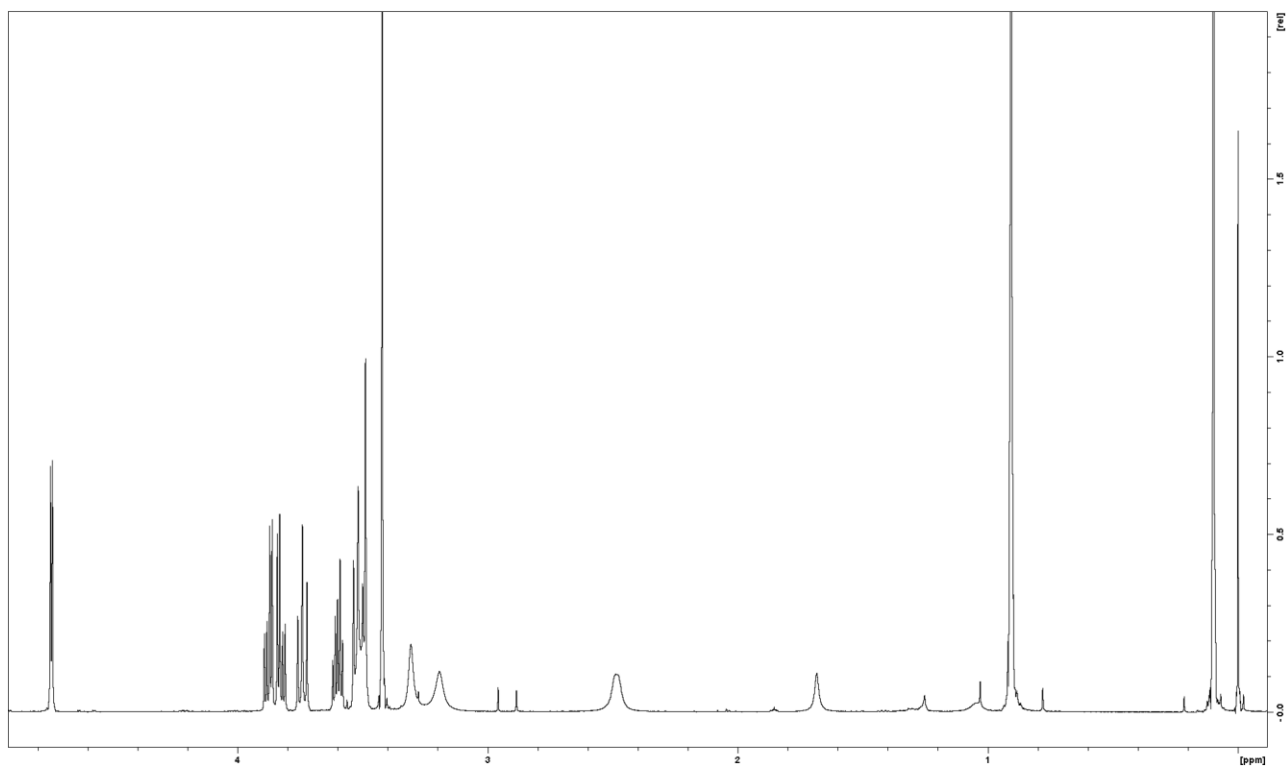

**Supplementary figure 15.**  $^1\text{H}$  NMR spectrum of Methyl 6-*O*-tertbutyldimethylsilyl- $\alpha$ -D-glucopyranoside (500.13 MHz, 23 °C,  $\text{CDCl}_3$ ).

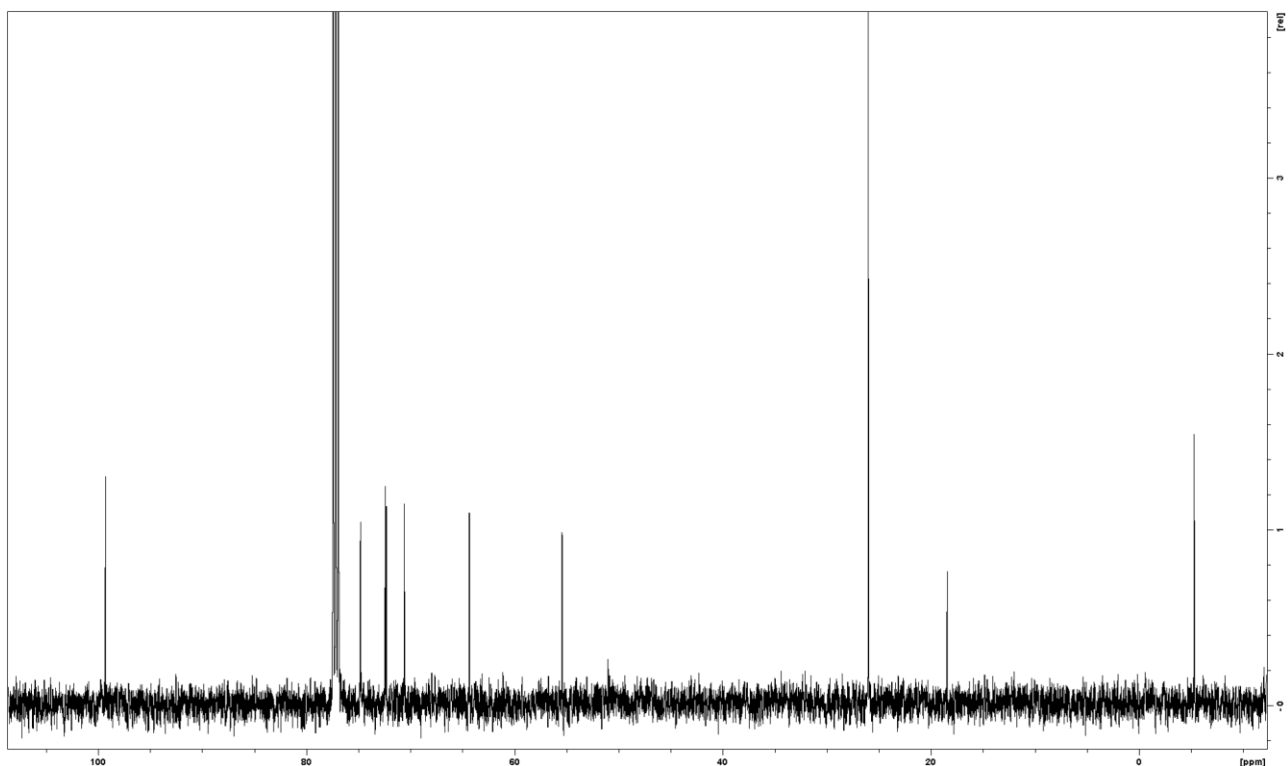

**Supplementary figure 16.**  $^{13}\text{C}$  NMR spectrum of Methyl 6-*O*-tertbutyldimethylsilyl- $\alpha$ -D-glucopyranoside (125.76 MHz, 23 °C,  $\text{CDCl}_3$ ).

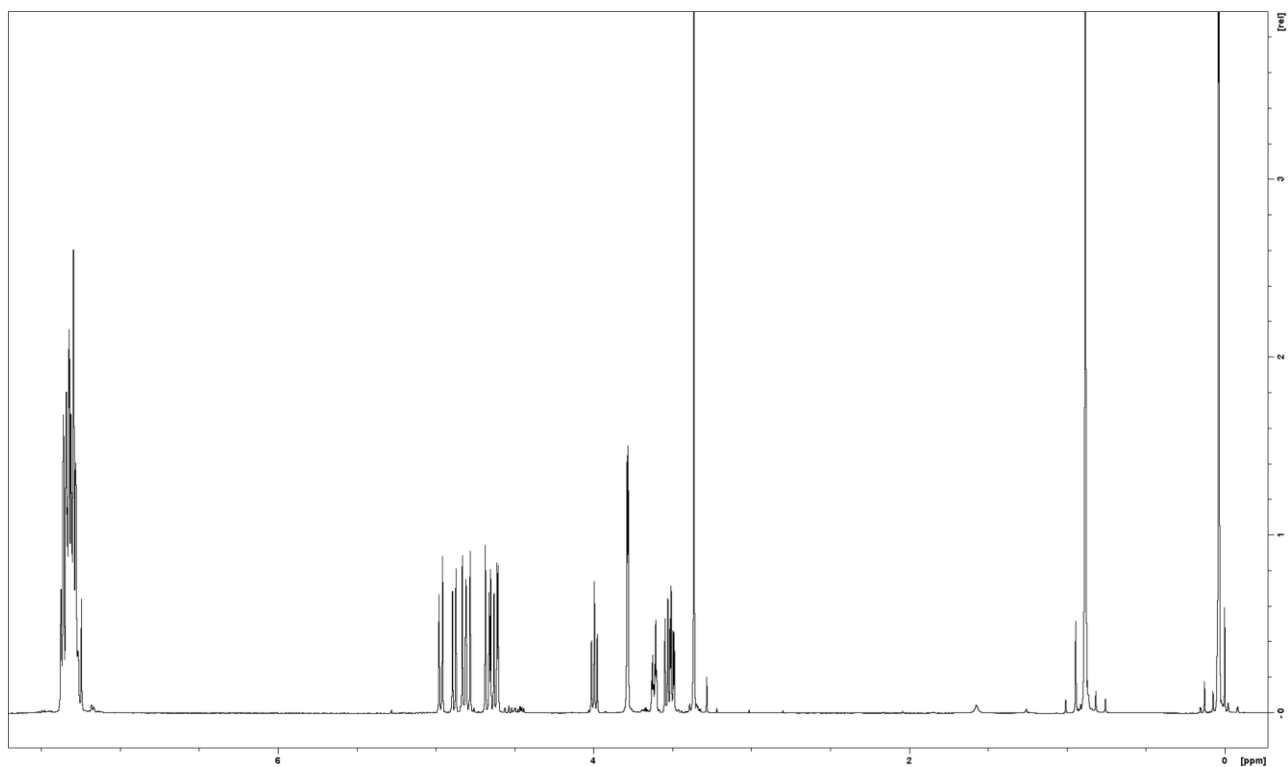

**Supplementary figure 17.**  $^1\text{H}$  NMR spectrum of **7** at 23 °C (500.13 MHz, 23 °C,  $\text{CDCl}_3$ ).

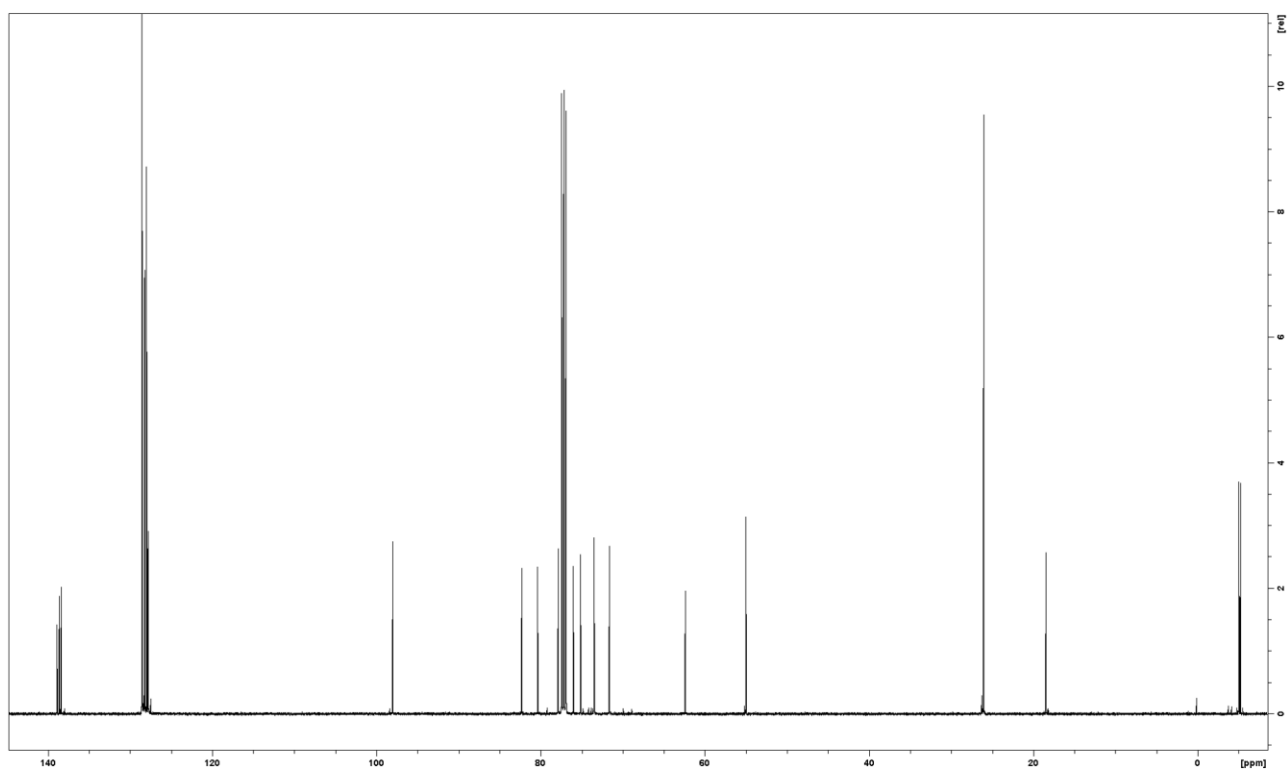

**Supplementary figure 18.**  $^{13}\text{C}$  NMR spectrum of **7** (125.76 MHz, 23 °C,  $\text{CDCl}_3$ ).

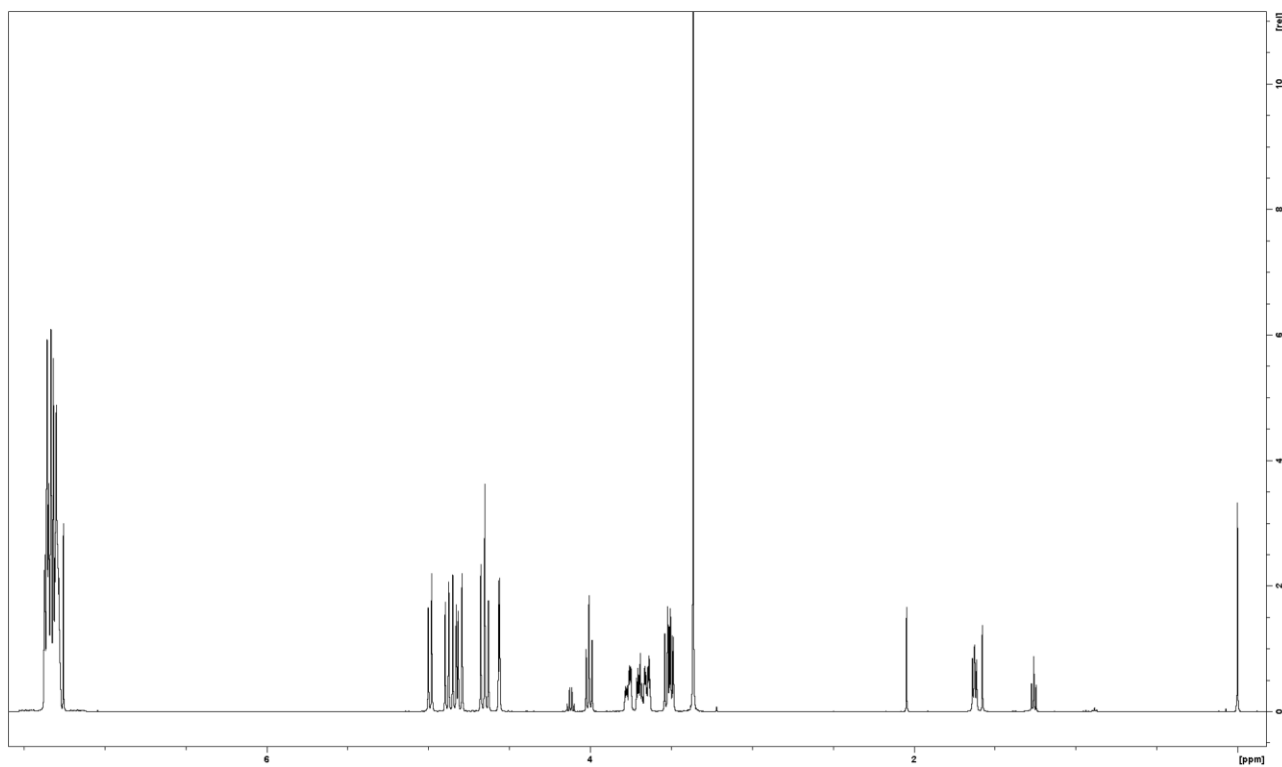

**Supplementary figure 19.** <sup>1</sup>H NMR spectrum of Methyl 2,3,4-tri-*O*-benzyl- $\alpha$ -D-glucopyranoside (500.13 MHz, 23 °C, CDCl<sub>3</sub>).

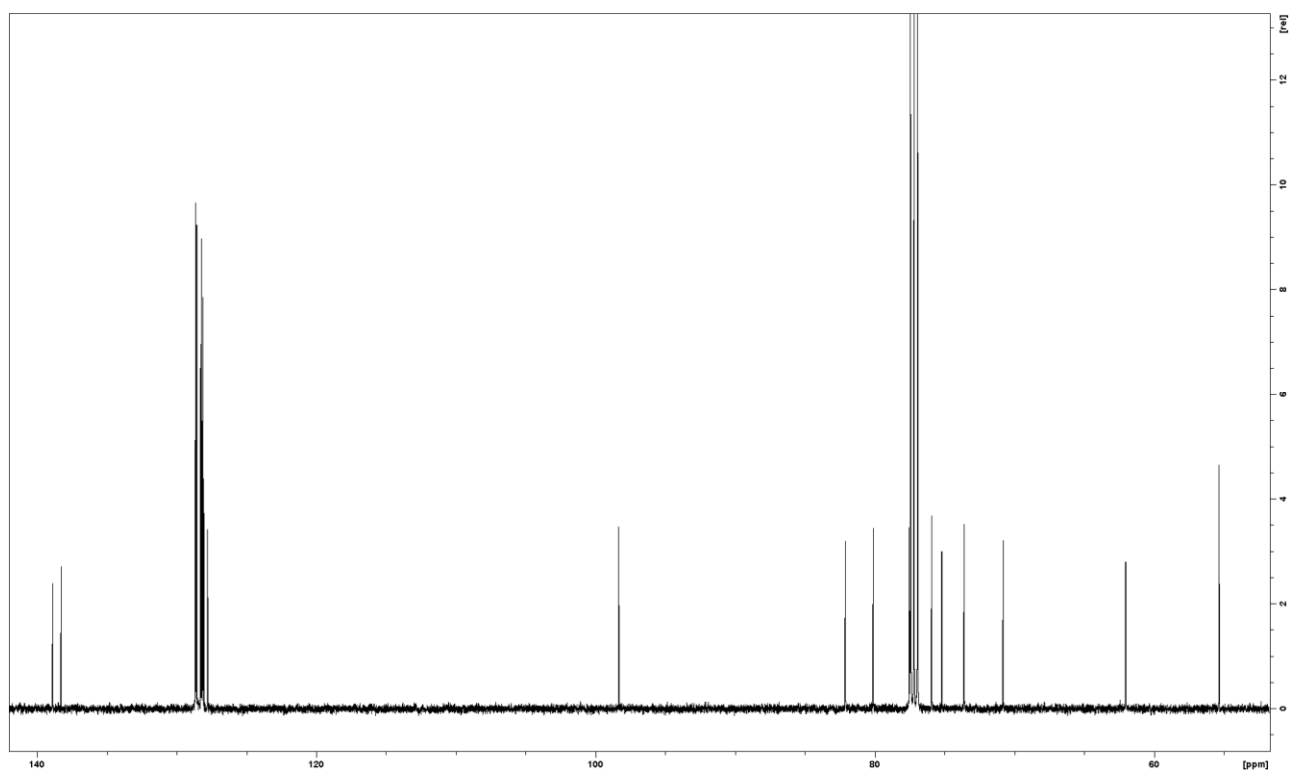

**Supplementary figure 20.** <sup>13</sup>C NMR spectrum of Methyl 2,3,4-tri-*O*-benzyl- $\alpha$ -D-glucopyranoside (125.76 MHz, 23 °C, CDCl<sub>3</sub>).

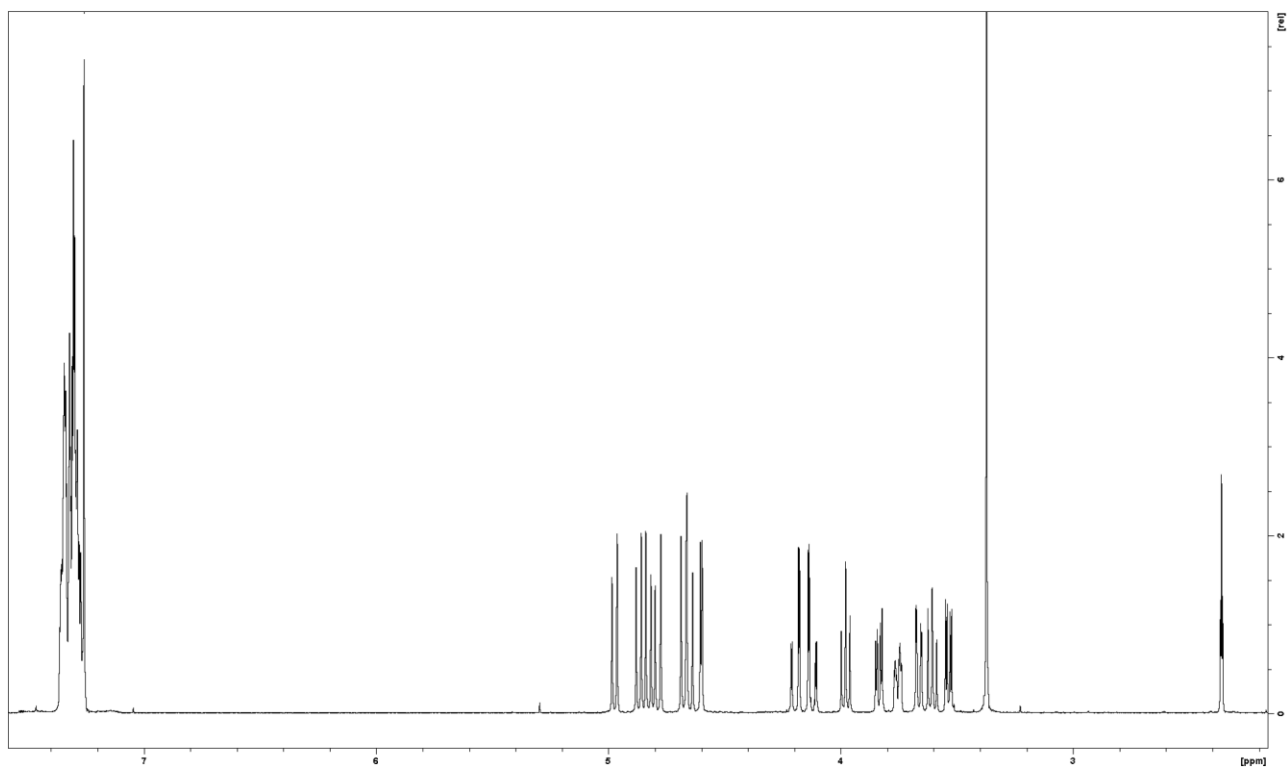

Supplementary figure 21. <sup>1</sup>H NMR spectrum of **8** (500.13 MHz, 23 °C, CDCl<sub>3</sub>).

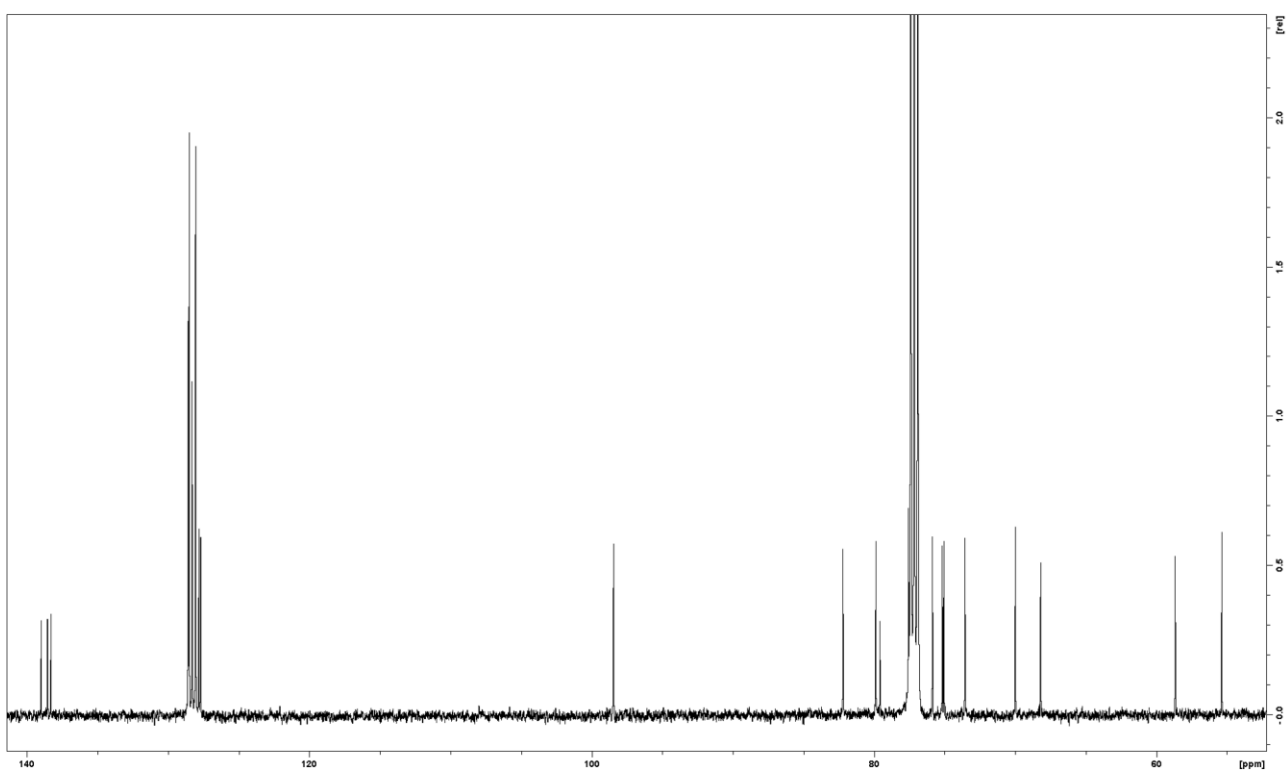

Supplementary figure 22. <sup>13</sup>C NMR spectrum of **8** (125.76 MHz, 23 °C, CDCl<sub>3</sub>).

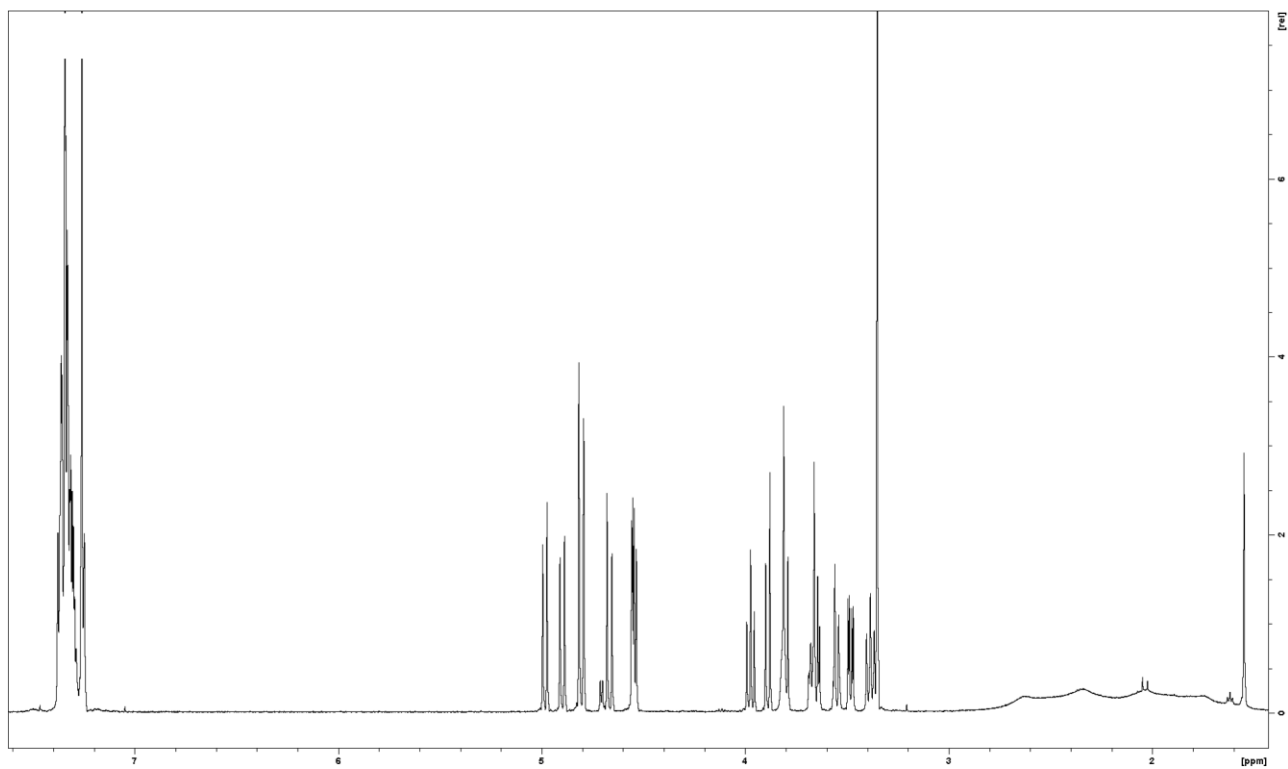

Supplementary figure 23.  $^1\text{H}$  NMR spectrum **9** (500.13 MHz, 23 °C,  $\text{CDCl}_3$ ).

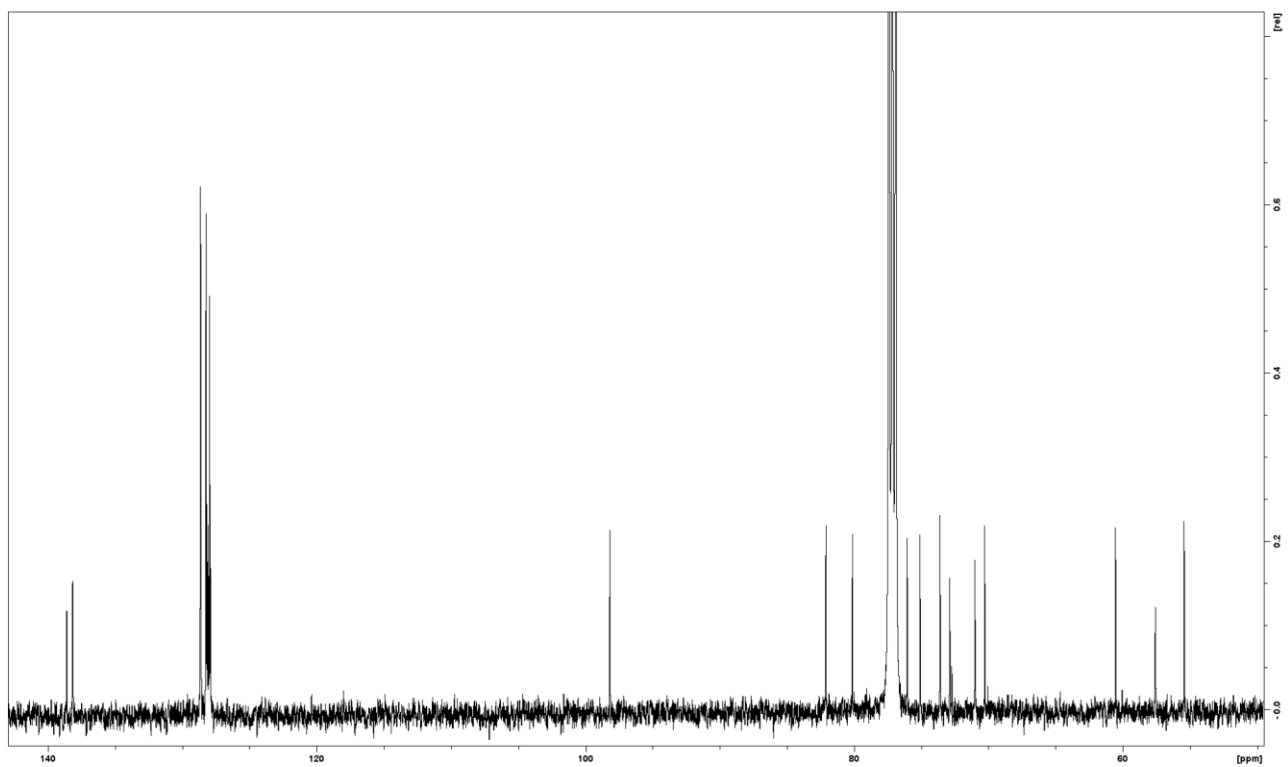

Supplementary figure 24.  $^{13}\text{C}$  NMR spectrum of **9** (125.76 MHz, 23 °C,  $\text{CDCl}_3$ ).

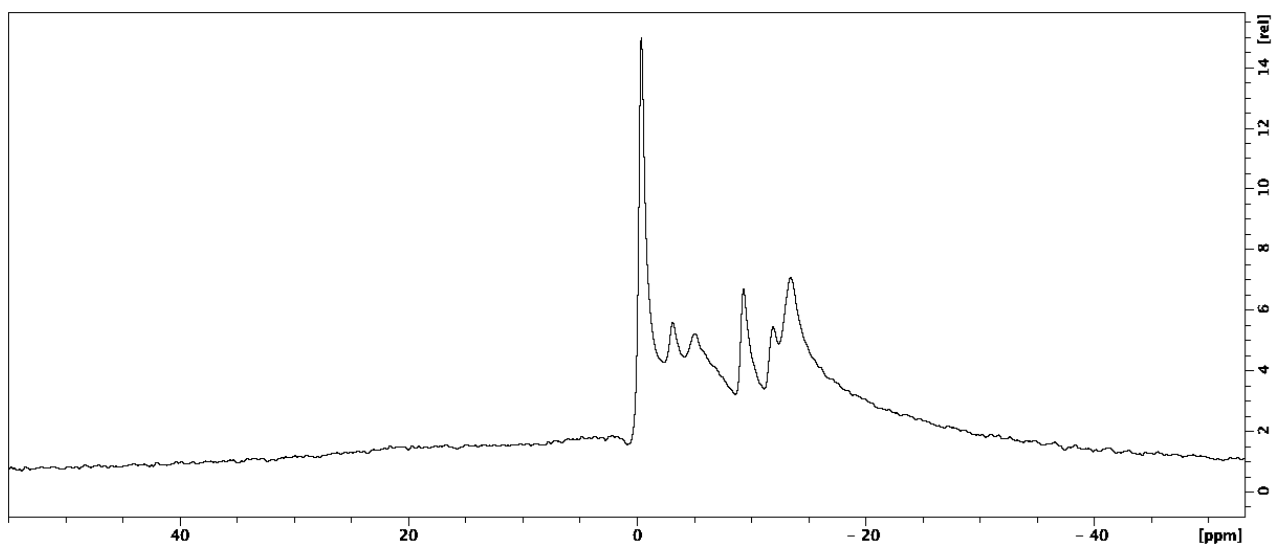

**Supplementary figure 25.**  $^{11}\text{B}$  NMR spectrum of **9** (160.46 MHz, 23 °C,  $\text{CDCl}_3$ ).

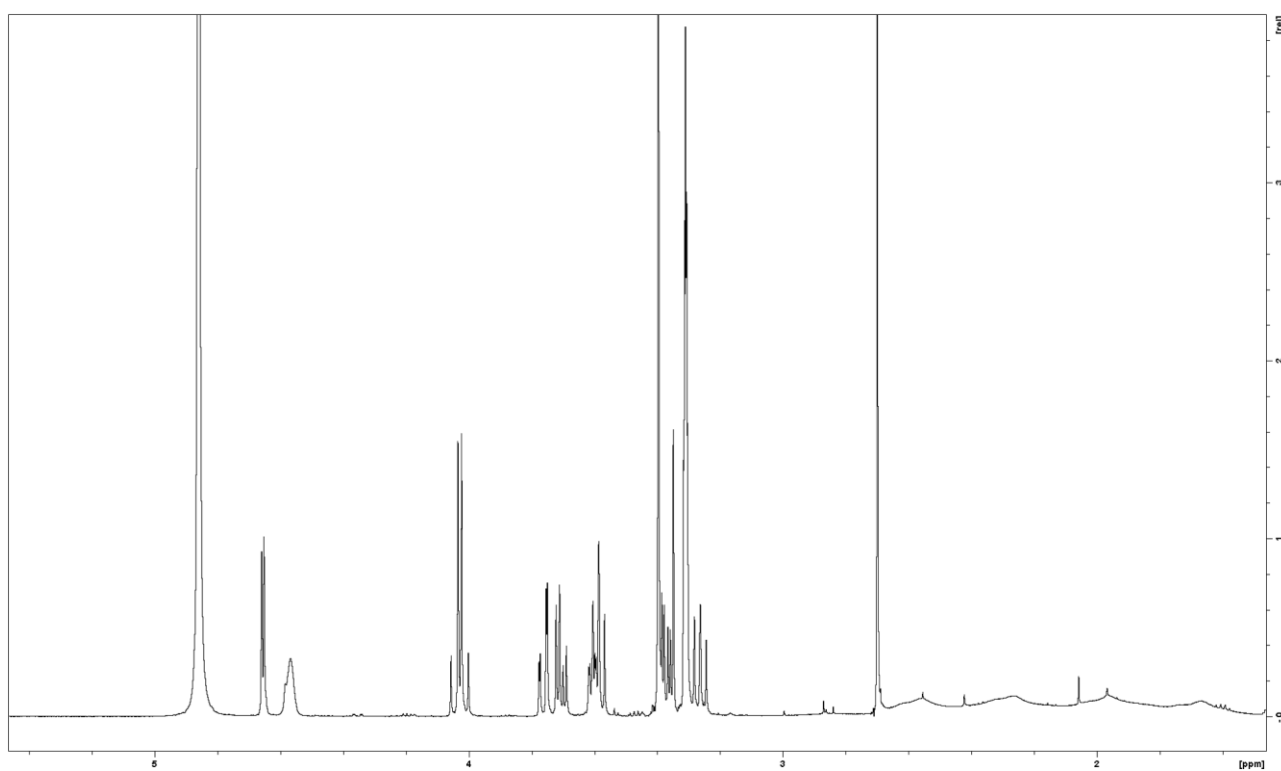

**Supplementary figure 26.**  $^1\text{H}$  NMR spectrum of **2** (500.13 MHz, 23 °C,  $\text{CD}_3\text{OD}$ ).

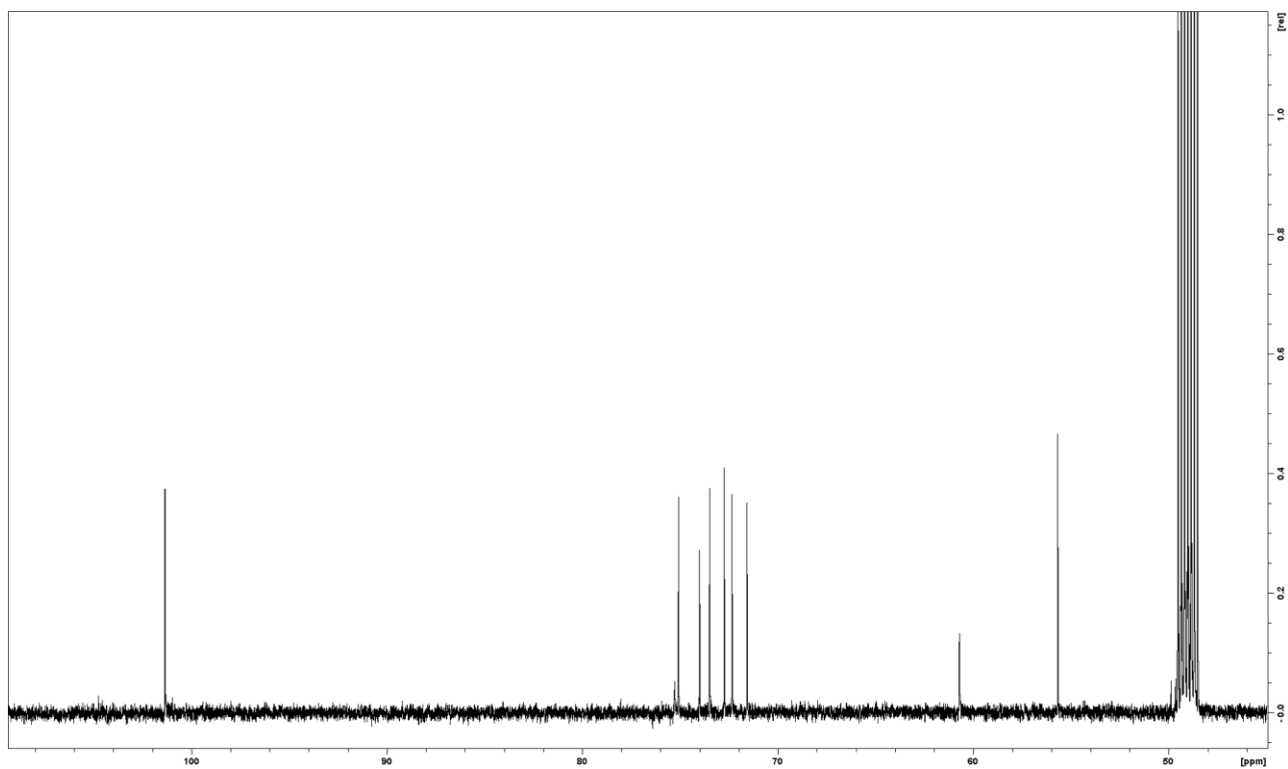

**Supplementary figure 27.**  $^{13}\text{C}$  NMR spectrum 2 (125.76 MHz, 23 °C,  $\text{CD}_3\text{OD}$ ).

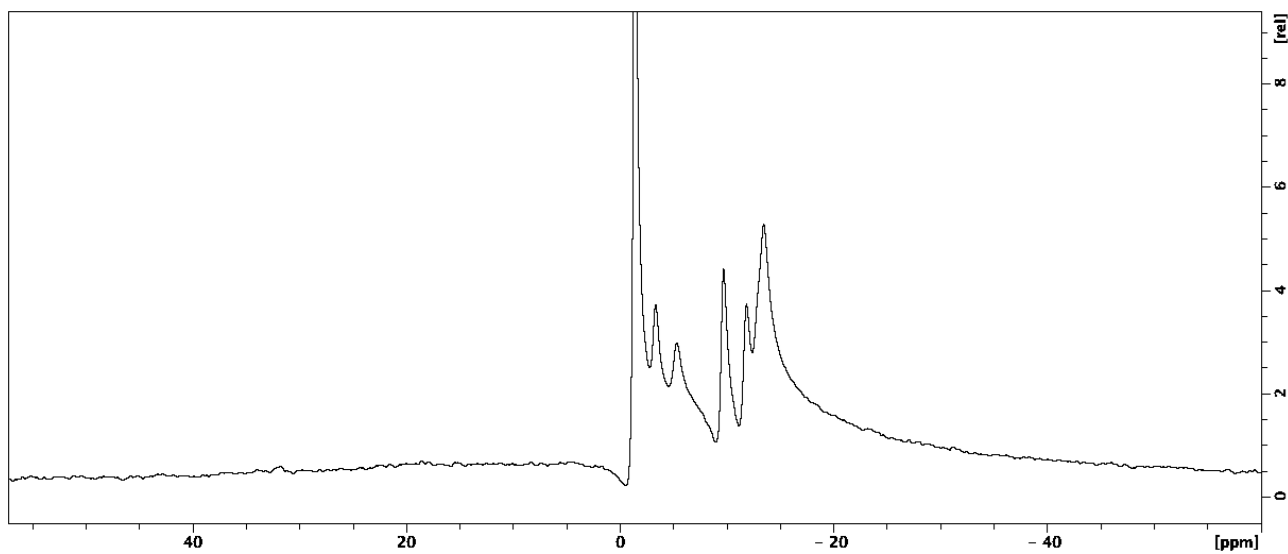

**Supplementary figure 28.**  $^{11}\text{B}$  NMR spectrum of 2 (160.46 MHz, 23 °C,  $\text{CD}_3\text{OD}$ ).



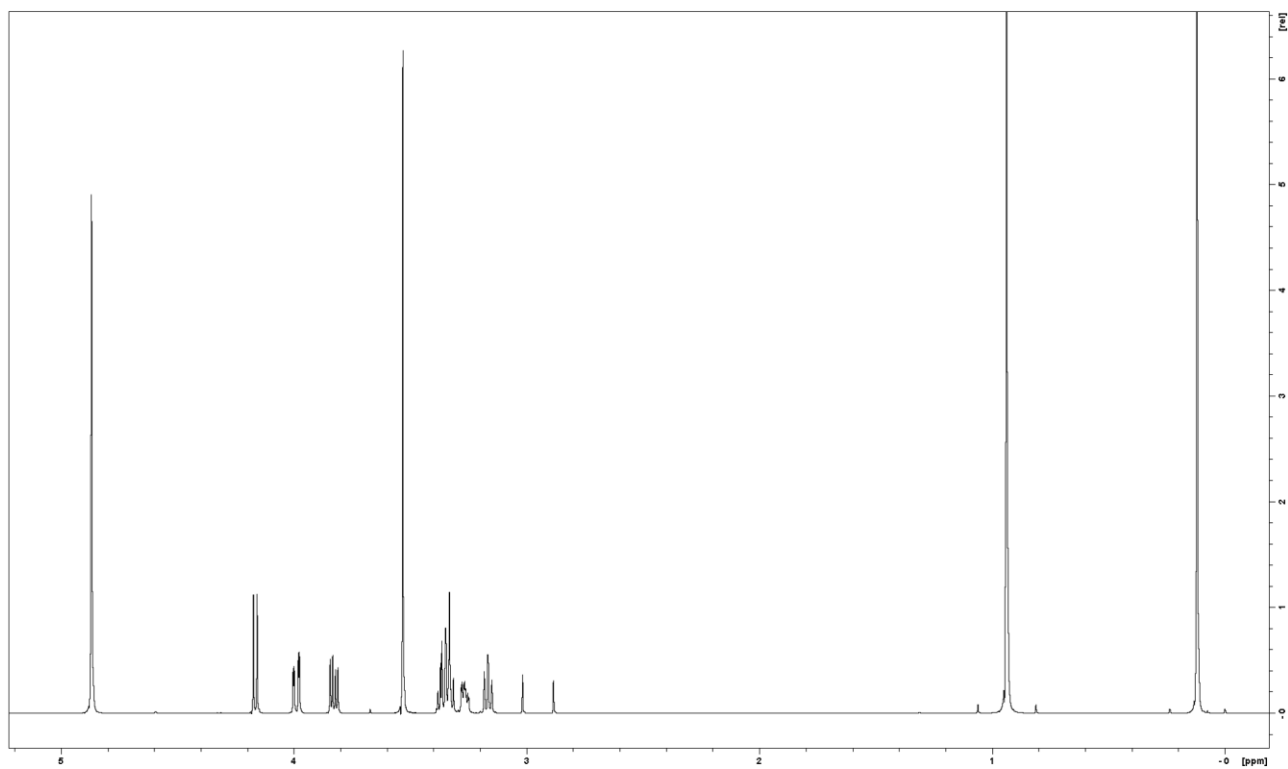

**Supplementary figure 29.** <sup>1</sup>H NMR spectrum of Methyl 6-*O*-tertbutyldimethylsilyl-β-D-glucopyranoside (500.13 MHz, 23 °C, CD<sub>3</sub>OD).

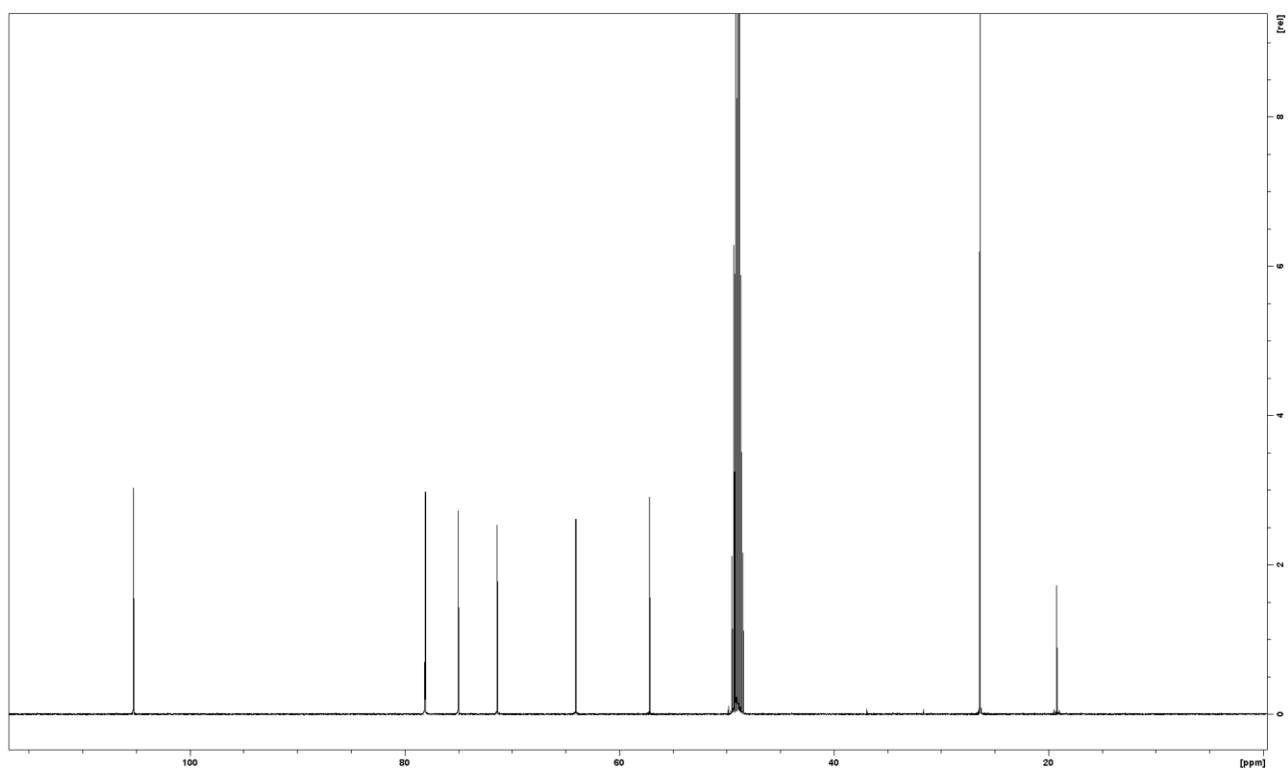

**Supplementary figure 30.** <sup>13</sup>C NMR spectrum of Methyl 6-*O*-tertbutyldimethylsilyl-β-D-glucopyranoside (125.76 MHz, 23 °C, CD<sub>3</sub>OD).

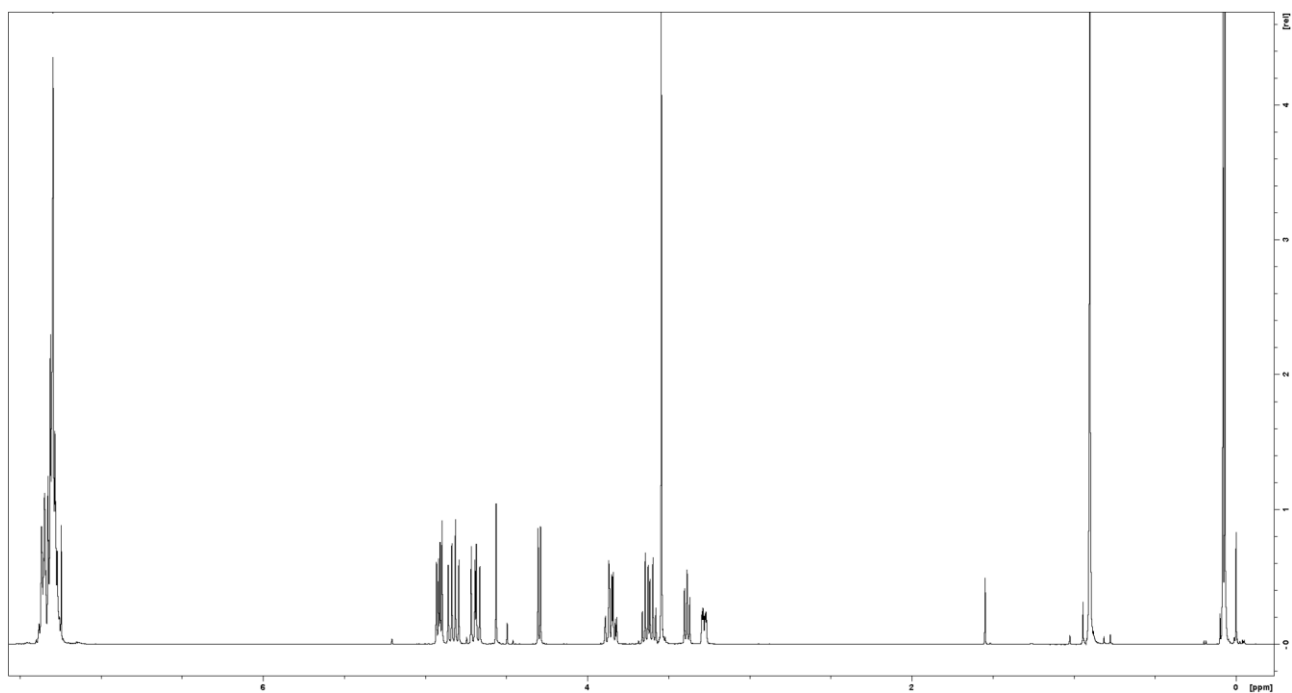

**Supplementary figure 31.**  $^1\text{H}$  NMR spectrum of **10** (500.13 MHz, 23 °C,  $\text{CDCl}_3$ ).

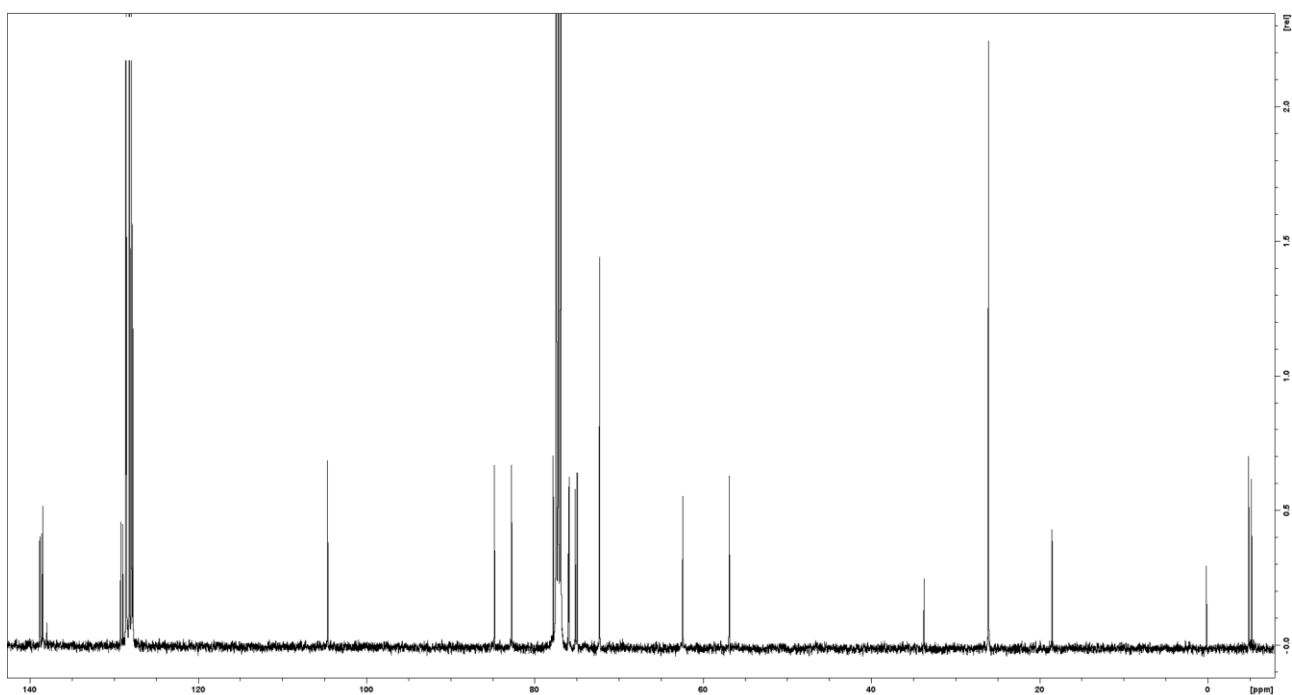

**Supplementary figure 32.**  $^{13}\text{C}$  NMR spectrum of **10** (125.76 MHz, 23 °C,  $\text{CDCl}_3$ ).

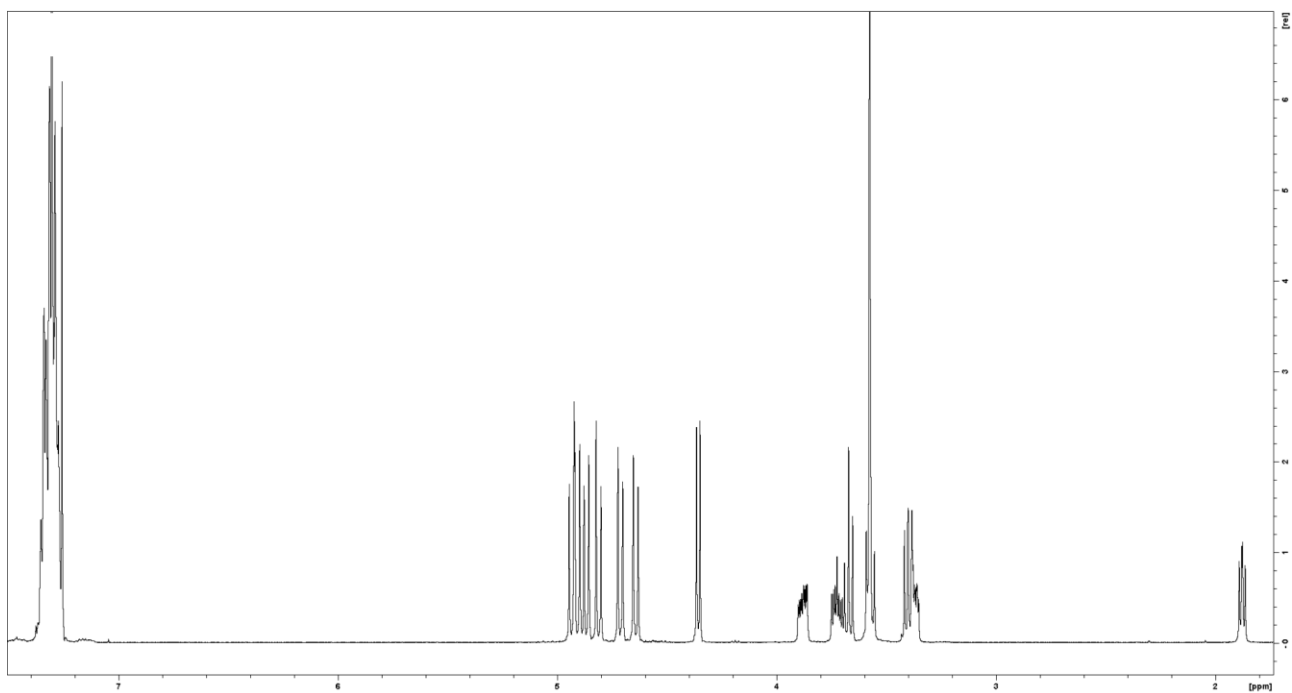

**Supplementary figure 33.** <sup>1</sup>H NMR spectrum of Methyl 2,3,4-tri-*O*-benzyl-β-D-glucopyranoside (500.13 MHz, 23 °C, CDCl<sub>3</sub>).

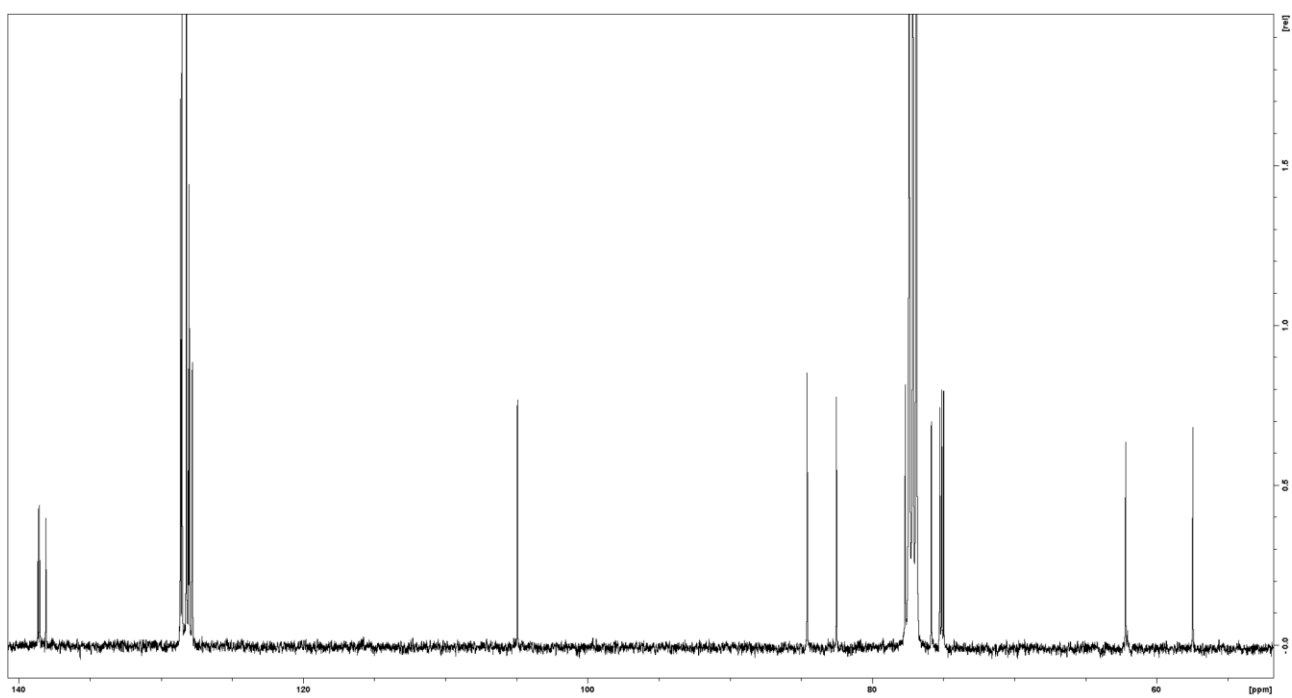

**Supplementary figure 34.** <sup>13</sup>C NMR spectrum of Methyl 2,3,4-tri-*O*-benzyl-β-D-glucopyranoside (125.76 MHz, 23 °C, CDCl<sub>3</sub>).

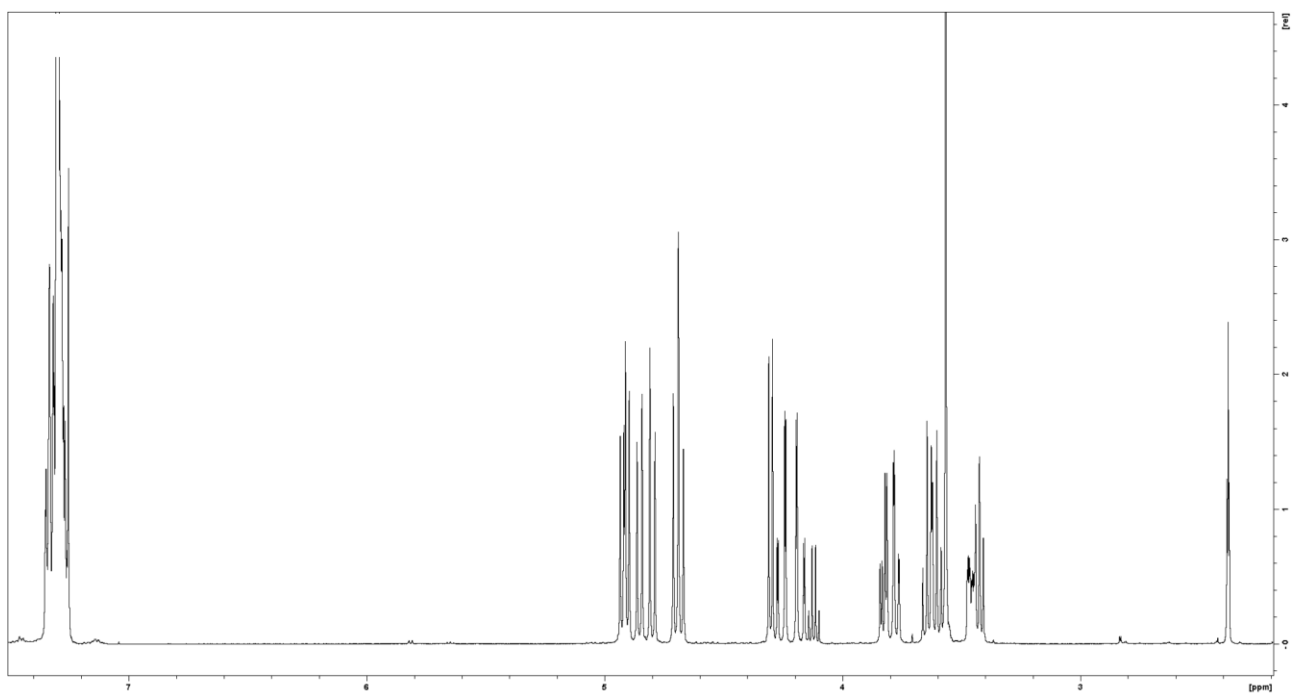

Supplementary figure 35.  $^1\text{H}$  NMR spectrum of **11** (500.13 MHz, 23 °C,  $\text{CDCl}_3$ ).

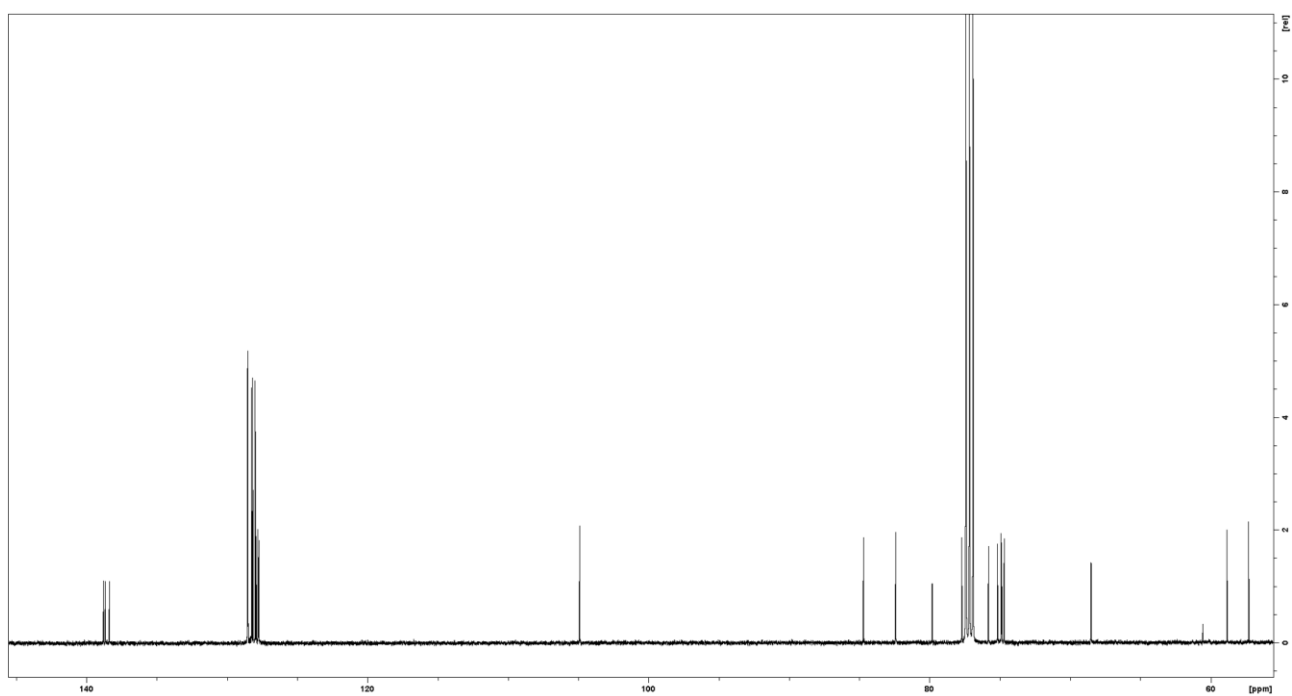

Supplementary figure 36.  $^{13}\text{C}$  NMR spectrum of **11** (125.76 MHz, 23 °C,  $\text{CDCl}_3$ ).

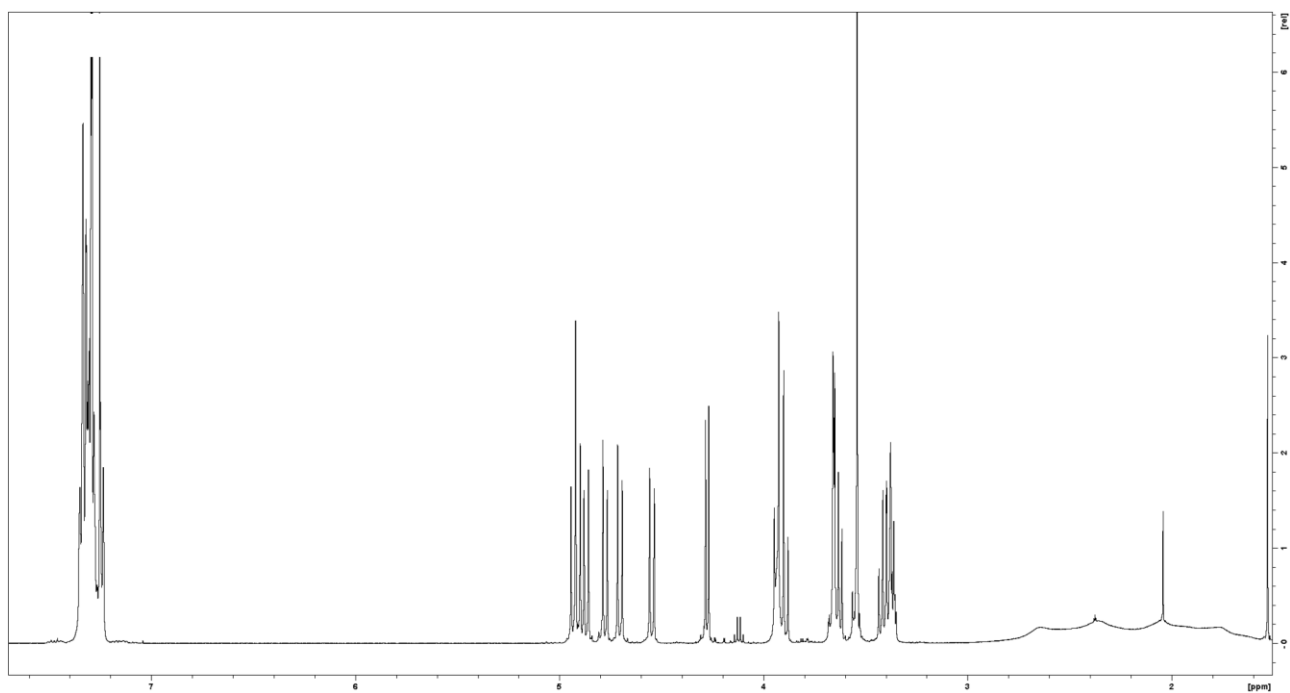

**Supplementary figure 37.**  $^1\text{H}$  NMR spectrum of **12** (500.13 MHz, 23 °C,  $\text{CDCl}_3$ ).

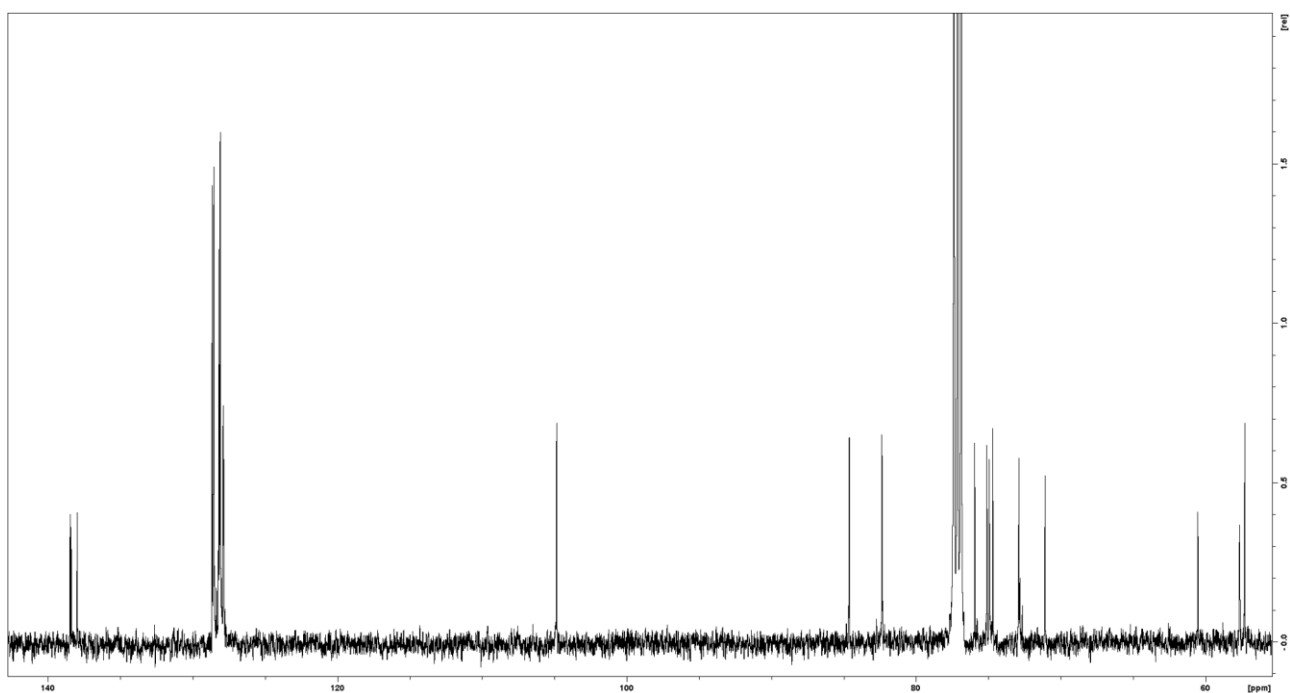

**Supplementary figure 38.**  $^{13}\text{C}$  NMR spectrum of **12** (125.76 MHz, 23 °C,  $\text{CDCl}_3$ ).

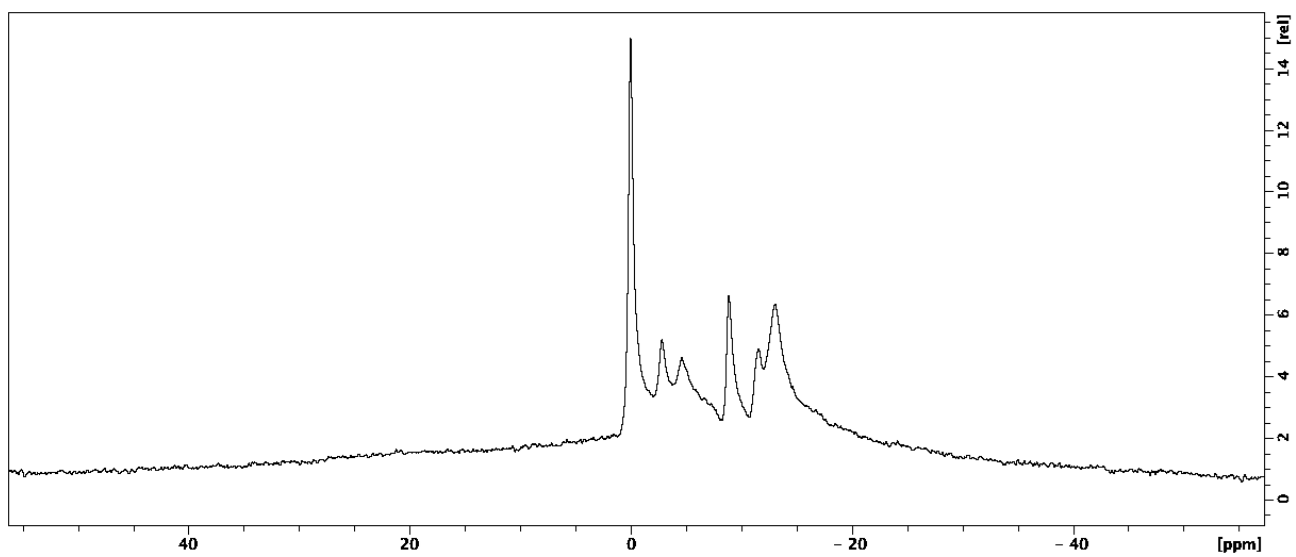

**Supplementary figure 39.**  $^{11}\text{B}$  NMR spectrum of **12** (160.46 MHz, 23 °C,  $\text{CDCl}_3$ ).

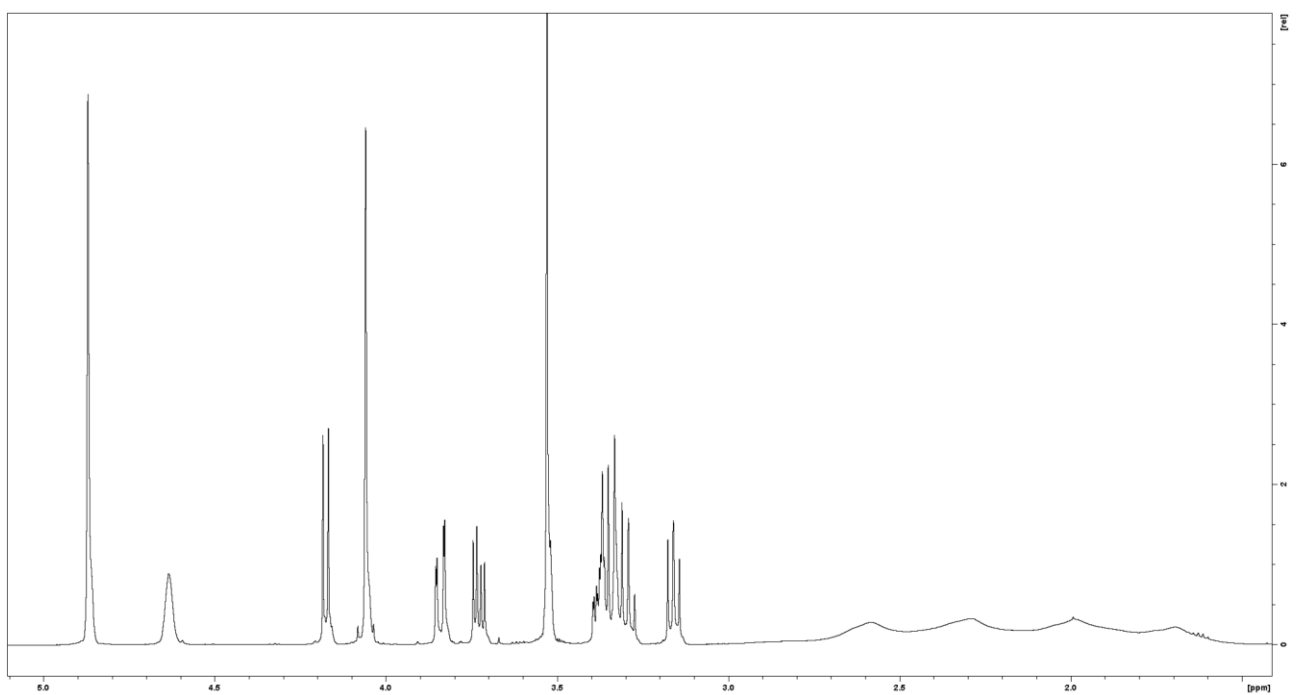

**Supplementary figure 40.**  $^1\text{H}$  NMR spectrum of **3** (500.13 MHz, 23 °C,  $\text{CD}_3\text{OD}$ ).

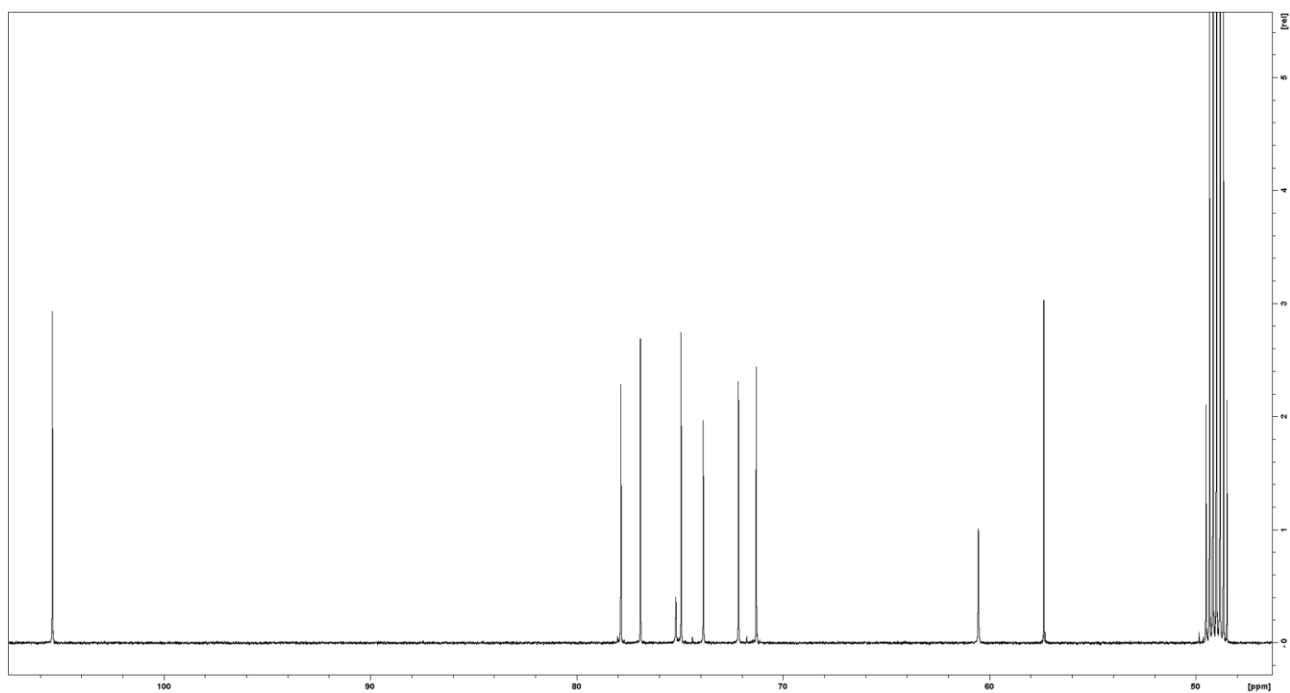

**Supplementary figure 41.**  $^{13}\text{C}$  NMR spectrum **3** (125.76 MHz, 23 °C,  $\text{CDCl}_3$ ).

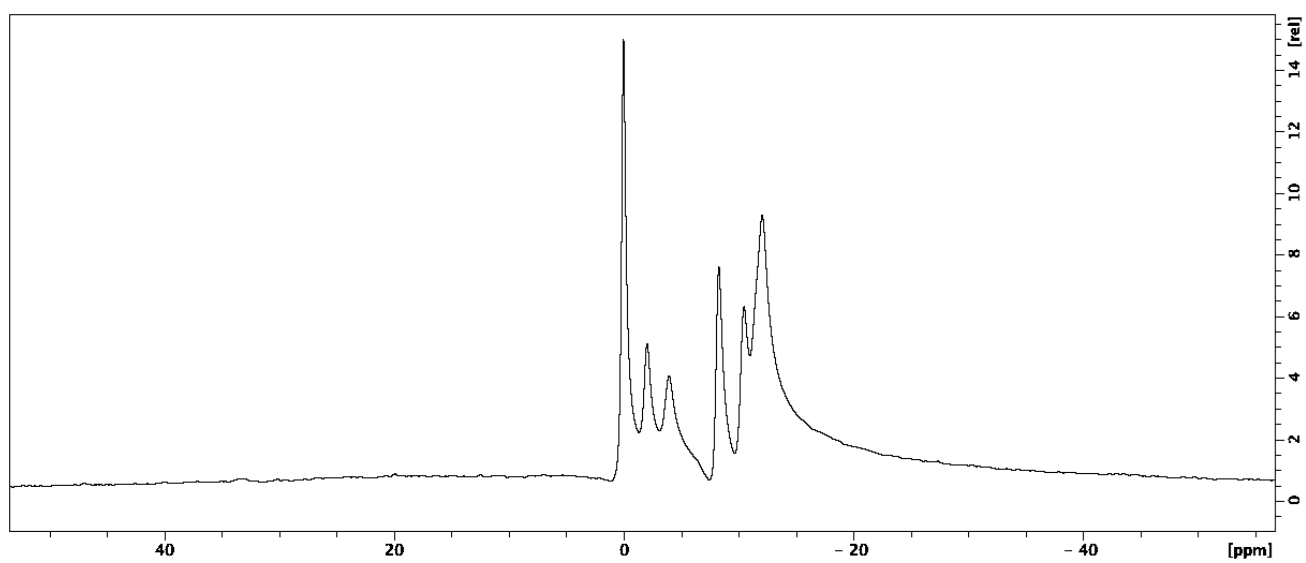

**Supplementary figure 42.**  $^{11}\text{B}$  NMR spectrum of **3** (160.46 MHz, 23 °C,  $\text{CD}_3\text{OD}$ ).

### 3. Docking results and Ligand PDBQT files

Supplementary table 1 shows the ligand binding energies for representative binding poses to the glucose transporter in both the outward and inward-open conformations, as computed using the Autodock protocol described above. For the outward-open conformation, based on PDB ID 6N3I, “pose A” represents the estimated natural binding site of  $\beta$ -glucose, while “pose B” represents the other major binding site. For the inward-open conformation, based on PDB ID 4QIQ, “pose 1” represents the major binding mode, while “pose 2” represents the second-best binding mode, based on mean binding energy.

The docking studies indicate that all glucoconjugates bind significantly stronger to the transporter protein than pristine glucose. Further, upon switching from the outward-open to the inward-open conformation, the binding energy is estimated to decrease notably for the glucoconjugates; the anomers of glucose show practically no change in binding energy.

**Supplementary table 1.** Calculated ligand binding energies of the studied species (kcal/mol) to the outward and inward-open conformations of the glucose transporter protein.

| outward-open (6N3I)            | mean binding energy (lowest binding energy) / % of docked ligands |                   |
|--------------------------------|-------------------------------------------------------------------|-------------------|
|                                | binding pose A                                                    | binding pose B    |
| <b>3</b>                       | -6.2 (-7.1) / 31%                                                 | -6.1 (-7.3) / 47% |
| <b>1<math>\beta</math></b>     | -5.6 (-6.6) / 30%                                                 | -5.6 (-6.9) / 58% |
| <b>2</b>                       | -5.6 (-6.6) / 15%                                                 | -5.5 (-6.7) / 72% |
| <b>1<math>\alpha</math></b>    | -5.6 (-6.5) / 36%                                                 | -5.5 (-6.7) / 54% |
| <b><math>\beta</math>-Glc</b>  | -0.9 (-1.5) / 55%                                                 | -0.7 (-1.4) / 15% |
| <b><math>\alpha</math>-Glc</b> | -0.2 (-1.0) / 10%                                                 | -0.3 (-0.7) / 80% |



| inward-open (4QIQ)             | mean binding energy (lowest binding energy) / % of docked ligands |                   |
|--------------------------------|-------------------------------------------------------------------|-------------------|
|                                | binding pose 1                                                    | binding pose 2    |
| <b>3</b>                       | -4.7 (-5.6) / 33%                                                 | -4.2 (-5.3) / 11% |
| <b>1<math>\beta</math></b>     | -4.3 (-5.1) / 56%                                                 | -3.8 (-4.6) / 13% |
| <b>2</b>                       | -4.2 (-5.2) / 43%                                                 | -4.1 (-5.0) / 14% |
| <b>1<math>\alpha</math></b>    | -3.9 (-4.7) / 69%                                                 | -3.6 (-4.6) / 9%  |
| <b><math>\beta</math>-Glc</b>  | -0.9 (-1.4) / 69%                                                 | -0.8 (-1.2) / 14% |
| <b><math>\alpha</math>-Glc</b> | -0.3 (-0.9) / 55%                                                 | -0.2 (-0.7) / 4%  |

### Ligand PDBQT files

The Autodock PDBQT ligand files, defining, *e.g.*, rotatable bonds and atomic partial charges are listed below for the studied ligands ( $\alpha/\beta$ -glucose, and **1-3**).

#### $\alpha$ -glucose:

REMARK 6 active torsions:

REMARK status: ('A' for Active; 'I' for Inactive)

REMARK 1 A between atoms: O\_12 and C\_1

REMARK 2 A between atoms: O\_11 and C\_2

REMARK 3 A between atoms: C\_3 and O\_4

REMARK 4 A between atoms: O\_10 and C\_5

REMARK 5 A between atoms: C\_6 and C\_7

REMARK 6 A between atoms: O\_8 and C\_7

ROOT

ATOM 1 C LIG d 1 1.645 1.651 0.607 0.00 0.00 0.636 C

ATOM 2 C LIG d 1 1.877 0.436 1.535 0.00 0.00 0.215 C

ATOM 3 C LIG d 1 0.838 -0.665 1.233 0.00 0.00 0.471 C

ATOM 4 C LIG d 1 -0.581 -0.071 1.371 0.00 0.00 0.175 C

ATOM 5 C LIG d 1 -0.736 1.188 0.483 0.00 0.00 0.295 C

ATOM 6 O LIG d 1 0.307 2.148 0.776 0.00 0.00 -0.690 OA

ENDROOT

BRANCH 1 7

```

ATOM 7 O LIG d 1 1.771 1.206 -0.728 0.00 0.00 -0.728 OA
ATOM 8 H LIG d 1 1.768 1.958 -1.358 0.00 0.00 0.449 HD
ENDBRANCH 1 7
BRANCH 2 9
ATOM 9 O LIG d 1 3.212 -0.001 1.294 0.00 0.00 -0.714 OA
ATOM 10 H LIG d 1 3.311 -0.934 1.610 0.00 0.00 0.432 HD
ENDBRANCH 2 9
BRANCH 5 11
ATOM 11 C LIG d 1 -2.034 1.953 0.785 0.00 0.00 0.340 C
BRANCH 11 12
ATOM 12 O LIG d 1 -3.147 1.098 0.485 0.00 0.00 -0.651 OA
ATOM 13 H LIG d 1 -3.297 1.056 -0.485 0.00 0.00 0.377 HD
ENDBRANCH 11 12
ENDBRANCH 5 11
BRANCH 3 14
ATOM 14 O LIG d 1 1.064 -1.649 2.249 0.00 0.00 -0.732 OA
ATOM 15 H LIG d 1 0.405 -2.377 2.153 0.00 0.00 0.425 HD
ENDBRANCH 3 14
BRANCH 4 16
ATOM 16 O LIG d 1 -1.458 -1.091 0.882 0.00 0.00 -0.735 OA
ATOM 17 H LIG d 1 -2.398 -0.756 0.913 0.00 0.00 0.435 HD
ENDBRANCH 4 16
TORSDOF 6

```

### **β-glucose:**

REMARK 6 active torsions:

REMARK status: ('A' for Active; 'I' for Inactive)

REMARK 1 A between atoms: C\_1 and O\_12

REMARK 2 A between atoms: C\_3 and C\_10

REMARK 3 A between atoms: O\_5 and C\_4

REMARK 4 A between atoms: C\_6 and O\_9

REMARK 5 A between atoms: O\_8 and C\_7

REMARK 6 A between atoms: O\_11 and C\_10

```

ROOT
ATOM  1 C  LIG d  1  0.680  1.367 -0.762  0.00  0.00  0.588 C
ATOM  2 O  LIG d  1 -0.441  1.035  0.078  0.00  0.00 -0.579 OA
ATOM  3 C  LIG d  1 -0.783 -0.370  0.145  0.00  0.00  0.238 C
ATOM  4 C  LIG d  1  0.410 -1.127  0.768  0.00  0.00  0.116 C
ATOM  5 C  LIG d  1  1.699 -0.887 -0.051  0.00  0.00  0.459 C
ATOM  6 C  LIG d  1  1.956  0.612 -0.299  0.00  0.00  0.125 C
ENDROOT
BRANCH 1 7
ATOM  7 O  LIG d  1  0.834  2.752 -0.556  0.00  0.00 -0.674 OA
ATOM  8 H  LIG d  1  0.563  3.003  0.362  0.00  0.00  0.411 HD
ENDBRANCH 1 7
BRANCH 6 9
ATOM  9 O  LIG d  1  2.896  0.619 -1.381  0.00  0.00 -0.672 OA
ATOM 10 H  LIG d  1  3.212  1.537 -1.548  0.00  0.00  0.416 HD
ENDBRANCH 6 9
BRANCH 5 11
ATOM 11 O  LIG d  1  2.734 -1.416  0.790  0.00  0.00 -0.704 OA
ATOM 12 H  LIG d  1  3.605 -1.336  0.334  0.00  0.00  0.414 HD
ENDBRANCH 5 11
BRANCH 3 13
ATOM 13 C  LIG d  1 -2.035 -0.405  1.036  0.00  0.00  0.399 C
BRANCH 13 14
ATOM 14 O  LIG d  1 -3.198 -0.117  0.262  0.00  0.00 -0.704 OA
ATOM 15 H  LIG d  1 -3.158  0.805 -0.077  0.00  0.00  0.400 HD
ENDBRANCH 13 14
ENDBRANCH 3 13
BRANCH 4 16
ATOM 16 O  LIG d  1  0.040 -2.507  0.684  0.00  0.00 -0.647 OA
ATOM 17 H  LIG d  1  0.788 -3.068  1.005  0.00  0.00  0.412 HD
ENDBRANCH 4 16
TORSDOF 6

```

**1a:**

REMARK 8 active torsions:

REMARK status: ('A' for Active; 'I' for Inactive)

REMARK 1 A between atoms: C\_1 and O\_12

REMARK 2 A between atoms: O\_11 and C\_2

REMARK 3 A between atoms: O\_10 and C\_3

REMARK 4 A between atoms: C\_4 and O\_9

REMARK 5 A between atoms: C\_5 and C\_6

REMARK 6 A between atoms: C\_6 and O\_8

REMARK 7 A between atoms: C\_17 and O\_8

REMARK 8 A between atoms: C\_17 and C\_18

REMARK I between atoms: C\_18 and C\_19

REMARK I between atoms: C\_19 and B\_27

REMARK I between atoms: C\_19 and B\_21

REMARK I between atoms: B\_27 and B\_21

REMARK I between atoms: B\_23 and B\_24

REMARK I between atoms: B\_24 and B\_29

REMARK I between atoms: B\_24 and B\_25

REMARK I between atoms: B\_27 and B\_25

REMARK I between atoms: B\_25 and B\_29

ROOT

ATOM 1 C LIG d 11 -0.225 6.248 -1.847 0.00 0.00 0.496 C

ATOM 2 C LIG d 11 -0.549 7.708 -2.142 0.00 0.00 0.282 C

ATOM 3 C LIG d 11 -0.997 8.393 -0.861 0.00 0.00 0.476 C

ATOM 4 C LIG d 11 -2.187 7.663 -0.259 0.00 0.00 0.104 C

ATOM 5 C LIG d 11 -1.819 6.189 -0.054 0.00 0.00 0.306 C

ATOM 6 O LIG d 11 -1.394 5.630 -1.305 0.00 0.00 -0.499 OA

ENDROOT

BRANCH 1 7

ATOM 7 O LIG d 11 0.859 6.188 -0.969 0.00 0.00 -0.720 OA

ATOM 8 H LIG d 11 1.132 5.266 -0.885 0.00 0.00 0.483 HD

ENDBRANCH 1 7

BRANCH 2 9

ATOM 9 O LIG d 11 0.574 8.345 -2.715 0.00 0.00 -0.714 OA

ATOM 10 H LIG d 11 0.398 9.294 -2.674 0.00 0.00 0.420 HD

```

ENDBRANCH 2 9
BRANCH 3 11
ATOM 11 O LIG d 11 -1.328 9.735 -1.210 0.00 0.00 -0.737 OA
ATOM 12 H LIG d 11 -1.587 10.181 -0.394 0.00 0.00 0.422 HD
ENDBRANCH 3 11
BRANCH 5 13
ATOM 13 C LIG d 11 -2.993 5.359 0.426 0.00 0.00 0.225 C
BRANCH 13 14
ATOM 14 O LIG d 11 -2.627 4.061 0.884 0.00 0.00 -0.279 OA
BRANCH 14 15
ATOM 15 C LIG d 11 -2.436 3.094 -0.128 0.00 0.00 0.014 C
BRANCH 15 16
ATOM 16 C LIG d 11 -1.154 2.308 0.118 0.00 0.00 0.436 A
ATOM 17 B LIG d 11 0.163 2.416 -0.953 0.00 0.00 -0.027 B
ATOM 18 H LIG d 11 0.056 3.181 -1.845 0.00 0.00 -0.066 HD
ATOM 19 B LIG d 11 -0.898 1.007 -0.965 0.00 0.00 -0.018 B
ATOM 20 B LIG d 11 1.578 2.031 0.025 0.00 0.00 0.011 B
ATOM 21 B LIG d 11 0.848 0.788 -1.019 0.00 0.00 0.092 B
ATOM 22 B LIG d 11 0.269 3.009 0.710 0.00 0.00 -0.065 B
ATOM 23 H LIG d 11 -1.741 0.814 -1.764 0.00 0.00 -0.060 HD
ATOM 24 B LIG d 11 -0.140 -0.259 0.014 0.00 0.00 0.020 B
ATOM 25 C LIG d 11 -1.298 0.777 0.674 0.00 0.00 0.203 A
ATOM 26 H LIG d 11 -0.456 -1.375 -0.197 0.00 0.00 -0.066 HD
ATOM 27 B LIG d 11 1.394 0.374 0.626 0.00 0.00 -0.005 B
ATOM 28 B LIG d 11 -0.024 0.333 1.682 0.00 0.00 0.025 B
ATOM 29 H LIG d 11 2.312 -0.344 0.818 0.00 0.00 -0.091 HD
ATOM 30 B LIG d 11 1.033 1.754 1.696 0.00 0.00 0.115 B
ATOM 31 B LIG d 11 -0.713 1.965 1.744 0.00 0.00 0.027 B
ATOM 32 H LIG d 11 1.683 2.029 2.643 0.00 0.00 -0.108 HD
ATOM 33 H LIG d 11 -1.432 2.346 2.590 0.00 0.00 -0.100 HD
ATOM 34 H LIG d 11 -0.259 -0.391 2.582 0.00 0.00 -0.068 HD
ATOM 35 H LIG d 11 2.628 2.519 -0.217 0.00 0.00 -0.098 HD
ATOM 36 H LIG d 11 1.358 0.376 -2.002 0.00 0.00 -0.103 HD
ATOM 37 H LIG d 11 0.260 4.164 0.936 0.00 0.00 -0.068 HD

```

ENDBRANCH 15 16  
 ENDBRANCH 14 15  
 ENDBRANCH 13 14  
 ENDBRANCH 5 13  
 BRANCH 4 38  
 ATOM 38 O LIG d 11 -2.482 8.320 0.979 0.00 0.00 -0.707 OA  
 ATOM 39 H LIG d 11 -3.423 8.241 1.163 0.00 0.00 0.443 HD  
 ENDBRANCH 4 38  
 TORSDOF 8

## 1β:

REMARK 8 active torsions:  
 REMARK status: ('A' for Active; 'I' for Inactive)  
 REMARK 1 A between atoms: C\_1 and O\_12  
 REMARK 2 A between atoms: C\_2 and O\_11  
 REMARK 3 A between atoms: O\_10 and C\_3  
 REMARK 4 A between atoms: O\_9 and C\_4  
 REMARK 5 A between atoms: C\_6 and C\_5  
 REMARK 6 A between atoms: O\_8 and C\_6  
 REMARK 7 A between atoms: O\_8 and C\_17  
 REMARK 8 A between atoms: C\_17 and C\_18  
 REMARK I between atoms: C\_18 and B\_23  
 REMARK I between atoms: C\_18 and B\_22  
 REMARK I between atoms: C\_18 and B\_21  
 REMARK I between atoms: B\_24 and B\_22  
 REMARK I between atoms: B\_22 and B\_23  
 REMARK I between atoms: B\_23 and B\_24  
 REMARK I between atoms: B\_25 and B\_24  
 REMARK I between atoms: B\_28 and B\_29  
 ROOT  
 ATOM 1 C LIG d 1 2.325 4.822 3.337 0.00 0.00 0.532 C  
 ATOM 2 C LIG d 1 2.737 6.288 3.452 0.00 0.00 0.111 C  
 ATOM 3 C LIG d 1 1.782 7.144 2.643 0.00 0.00 0.437 C  
 ATOM 4 C LIG d 1 1.722 6.655 1.206 0.00 0.00 0.147 C

ATOM 5 C LIG d 1 1.363 5.169 1.192 0.00 0.00 0.269 C  
 ATOM 6 O LIG d 1 2.328 4.444 1.970 0.00 0.00 -0.498 OA  
 ENDROOT  
 BRANCH 1 7  
 ATOM 7 O LIG d 1 3.198 3.979 4.031 0.00 0.00 -0.627 OA  
 ATOM 8 H LIG d 1 4.048 3.997 3.571 0.00 0.00 0.400 HD  
 ENDBRANCH 1 7  
 BRANCH 2 9  
 ATOM 9 O LIG d 1 2.679 6.742 4.796 0.00 0.00 -0.659 OA  
 ATOM 10 H LIG d 1 3.171 6.112 5.338 0.00 0.00 0.406 HD  
 ENDBRANCH 2 9  
 BRANCH 5 11  
 ATOM 11 C LIG d 1 1.361 4.601 -0.214 0.00 0.00 0.280 C  
 BRANCH 11 12  
 ATOM 12 O LIG d 1 0.749 3.320 -0.299 0.00 0.00 -0.266 OA  
 BRANCH 12 13  
 ATOM 13 C LIG d 1 1.613 2.248 0.019 0.00 0.00 -0.030 C  
 BRANCH 13 14  
 ATOM 14 C LIG d 1 0.820 0.957 0.059 0.00 0.00 0.459 A  
 ATOM 15 C LIG d 1 0.795 0.023 -1.279 0.00 0.00 0.194 A  
 ATOM 16 B LIG d 1 -0.649 -0.829 -1.443 0.00 0.00 0.064 B  
 ATOM 17 B LIG d 1 0.842 -1.626 -0.909 0.00 0.00 0.032 B  
 ATOM 18 B LIG d 1 1.785 -0.456 0.024 0.00 0.00 -0.039 B  
 ATOM 19 B LIG d 1 -0.638 0.840 -0.849 0.00 0.00 -0.018 B  
 ATOM 20 H LIG d 1 -1.058 -1.015 -2.533 0.00 0.00 -0.075 HD  
 ATOM 21 B LIG d 1 -0.674 -1.911 -0.043 0.00 0.00 -0.036 B  
 ATOM 22 B LIG d 1 -1.584 -0.378 -0.006 0.00 0.00 0.076 B  
 ATOM 23 H LIG d 1 -1.216 -2.960 -0.101 0.00 0.00 -0.083 HD  
 ATOM 24 B LIG d 1 -0.664 -0.911 1.420 0.00 0.00 0.026 B  
 ATOM 25 B LIG d 1 0.842 -1.679 0.862 0.00 0.00 0.081 B  
 ATOM 26 B LIG d 1 0.853 -0.013 1.456 0.00 0.00 0.039 B  
 ATOM 27 H LIG d 1 -1.199 -1.234 2.424 0.00 0.00 -0.100 HD  
 ATOM 28 B LIG d 1 -0.630 0.792 0.922 0.00 0.00 -0.013 B  
 ATOM 29 H LIG d 1 1.447 0.417 2.380 0.00 0.00 -0.090 HD

ATOM 30 H LIG d 1 -1.030 1.735 1.503 0.00 0.00 -0.075 HD  
 ATOM 31 H LIG d 1 1.393 -2.544 1.449 0.00 0.00 -0.103 HD  
 ATOM 32 H LIG d 1 -2.764 -0.324 -0.034 0.00 0.00 -0.096 HD  
 ATOM 33 H LIG d 1 1.427 -2.338 -1.645 0.00 0.00 -0.071 HD  
 ATOM 34 H LIG d 1 2.947 -0.298 -0.091 0.00 0.00 -0.056 HD  
 ATOM 35 H LIG d 1 -0.957 1.766 -1.495 0.00 0.00 -0.085 HD  
 ENDBRANCH 13 14  
 ENDBRANCH 12 13  
 ENDBRANCH 11 12  
 ENDBRANCH 5 11  
 BRANCH 3 36  
 ATOM 36 O LIG d 1 2.177 8.511 2.601 0.00 0.00 -0.717 OA  
 ATOM 37 H LIG d 1 2.243 8.823 3.512 0.00 0.00 0.433 HD  
 ENDBRANCH 3 36  
 BRANCH 4 38  
 ATOM 38 O LIG d 1 0.734 7.360 0.472 0.00 0.00 -0.670 OA  
 ATOM 39 H LIG d 1 0.857 8.298 0.673 0.00 0.00 0.424 HD  
 ENDBRANCH 4 38  
 TORSDOF 8

## 2:

REMARK 8 active torsions:  
 REMARK status: ('A' for Active; 'I' for Inactive)  
 REMARK 1 A between atoms: C\_1 and O\_12  
 REMARK 2 A between atoms: O\_11 and C\_2  
 REMARK 3 A between atoms: O\_10 and C\_3  
 REMARK 4 A between atoms: C\_4 and O\_9  
 REMARK 5 A between atoms: C\_5 and C\_6  
 REMARK 6 A between atoms: C\_6 and O\_8  
 REMARK 7 A between atoms: C\_17 and O\_8  
 REMARK 8 A between atoms: C\_17 and C\_18  
 REMARK I between atoms: C\_18 and C\_19  
 REMARK I between atoms: C\_19 and B\_21  
 REMARK I between atoms: B\_21 and B\_27



REMARK I between atoms: B\_23 and B\_24

REMARK I between atoms: B\_24 and B\_29

REMARK I between atoms: B\_24 and B\_25

REMARK I between atoms: B\_27 and B\_25

REMARK I between atoms: B\_29 and B\_25

REMARK I between atoms: B\_26 and B\_29

ROOT

|      |   |   |           |        |       |        |      |      |        |    |
|------|---|---|-----------|--------|-------|--------|------|------|--------|----|
| ATOM | 1 | C | LIG d 111 | -0.398 | 6.934 | -2.146 | 0.00 | 0.00 | 0.539  | C  |
| ATOM | 2 | C | LIG d 111 | -1.059 | 8.295 | -2.322 | 0.00 | 0.00 | 0.172  | C  |
| ATOM | 3 | C | LIG d 111 | -1.435 | 8.851 | -0.960 | 0.00 | 0.00 | 0.479  | C  |
| ATOM | 4 | C | LIG d 111 | -2.333 | 7.873 | -0.221 | 0.00 | 0.00 | 0.115  | C  |
| ATOM | 5 | C | LIG d 111 | -1.642 | 6.506 | -0.146 | 0.00 | 0.00 | 0.324  | C  |
| ATOM | 6 | O | LIG d 111 | -1.318 | 6.068 | -1.474 | 0.00 | 0.00 | -0.532 | OA |

ENDROOT

BRANCH 1 7

|      |   |   |           |       |       |        |      |      |        |    |
|------|---|---|-----------|-------|-------|--------|------|------|--------|----|
| ATOM | 7 | O | LIG d 111 | 0.790 | 7.088 | -1.439 | 0.00 | 0.00 | -0.447 | OA |
| ATOM | 8 | C | LIG d 111 | 1.581 | 5.903 | -1.411 | 0.00 | 0.00 | 0.253  | C  |

ENDBRANCH 1 7

BRANCH 2 9

|      |    |   |           |        |        |        |      |      |        |    |
|------|----|---|-----------|--------|--------|--------|------|------|--------|----|
| ATOM | 9  | O | LIG d 111 | -0.192 | 9.161  | -3.027 | 0.00 | 0.00 | -0.713 | OA |
| ATOM | 10 | H | LIG d 111 | -0.558 | 10.050 | -2.927 | 0.00 | 0.00 | 0.436  | HD |

ENDBRANCH 2 9

BRANCH 3 11

|      |    |   |           |        |        |        |      |      |        |    |
|------|----|---|-----------|--------|--------|--------|------|------|--------|----|
| ATOM | 11 | O | LIG d 111 | -2.094 | 10.094 | -1.194 | 0.00 | 0.00 | -0.730 | OA |
| ATOM | 12 | H | LIG d 111 | -2.311 | 10.464 | -0.329 | 0.00 | 0.00 | 0.421  | HD |

ENDBRANCH 3 11

BRANCH 5 13

|      |    |   |           |        |       |       |      |      |       |   |
|------|----|---|-----------|--------|-------|-------|------|------|-------|---|
| ATOM | 13 | C | LIG d 111 | -2.527 | 5.444 | 0.476 | 0.00 | 0.00 | 0.194 | C |
|------|----|---|-----------|--------|-------|-------|------|------|-------|---|

BRANCH 13 14

|      |    |   |           |        |       |       |      |      |        |    |
|------|----|---|-----------|--------|-------|-------|------|------|--------|----|
| ATOM | 14 | O | LIG d 111 | -1.827 | 4.249 | 0.803 | 0.00 | 0.00 | -0.245 | OA |
|------|----|---|-----------|--------|-------|-------|------|------|--------|----|

BRANCH 14 15

|      |    |   |           |        |       |        |      |      |        |   |
|------|----|---|-----------|--------|-------|--------|------|------|--------|---|
| ATOM | 15 | C | LIG d 111 | -1.733 | 3.332 | -0.267 | 0.00 | 0.00 | -0.001 | C |
|------|----|---|-----------|--------|-------|--------|------|------|--------|---|

BRANCH 15 16

|      |    |   |           |        |       |       |      |      |       |   |
|------|----|---|-----------|--------|-------|-------|------|------|-------|---|
| ATOM | 16 | C | LIG d 111 | -0.771 | 2.222 | 0.109 | 0.00 | 0.00 | 0.469 | A |
|------|----|---|-----------|--------|-------|-------|------|------|-------|---|

|                 |    |   |           |        |        |        |      |      |        |    |
|-----------------|----|---|-----------|--------|--------|--------|------|------|--------|----|
| ATOM            | 17 | B | LIG d 111 | 0.602  | 1.925  | -0.850 | 0.00 | 0.00 | 0.067  | B  |
| ATOM            | 18 | H | LIG d 111 | 0.783  | 2.667  | -1.749 | 0.00 | 0.00 | -0.107 | HD |
| ATOM            | 19 | B | LIG d 111 | -0.812 | 0.874  | -0.942 | 0.00 | 0.00 | -0.051 | B  |
| ATOM            | 20 | B | LIG d 111 | 1.768  | 1.184  | 0.244  | 0.00 | 0.00 | -0.013 | B  |
| ATOM            | 21 | B | LIG d 111 | 0.797  | 0.169  | -0.850 | 0.00 | 0.00 | 0.075  | B  |
| ATOM            | 22 | B | LIG d 111 | 0.743  | 2.514  | 0.813  | 0.00 | 0.00 | -0.024 | B  |
| ATOM            | 23 | H | LIG d 111 | -1.611 | 0.904  | -1.808 | 0.00 | 0.00 | -0.060 | HD |
| ATOM            | 24 | B | LIG d 111 | -0.526 | -0.526 | 0.103  | 0.00 | 0.00 | 0.047  | B  |
| ATOM            | 25 | C | LIG d 111 | -1.390 | 0.815  | 0.660  | 0.00 | 0.00 | 0.184  | A  |
| ATOM            | 26 | H | LIG d 111 | -1.129 | -1.513 | -0.127 | 0.00 | 0.00 | -0.073 | HD |
| ATOM            | 27 | B | LIG d 111 | 1.073  | -0.335 | 0.836  | 0.00 | 0.00 | -0.011 | B  |
| ATOM            | 28 | B | LIG d 111 | -0.376 | 0.056  | 1.771  | 0.00 | 0.00 | 0.048  | B  |
| ATOM            | 29 | H | LIG d 111 | 1.731  | -1.279 | 1.109  | 0.00 | 0.00 | -0.093 | HD |
| ATOM            | 30 | B | LIG d 111 | 1.038  | 1.121  | 1.865  | 0.00 | 0.00 | 0.114  | B  |
| ATOM            | 31 | B | LIG d 111 | -0.574 | 1.817  | 1.770  | 0.00 | 0.00 | -0.026 | B  |
| ATOM            | 32 | H | LIG d 111 | 1.663  | 1.226  | 2.862  | 0.00 | 0.00 | -0.106 | HD |
| ATOM            | 33 | H | LIG d 111 | -1.216 | 2.404  | 2.557  | 0.00 | 0.00 | -0.090 | HD |
| ATOM            | 34 | H | LIG d 111 | -0.877 | -0.546 | 2.653  | 0.00 | 0.00 | -0.075 | HD |
| ATOM            | 35 | H | LIG d 111 | 2.929  | 1.344  | 0.086  | 0.00 | 0.00 | -0.093 | HD |
| ATOM            | 36 | H | LIG d 111 | 1.243  | -0.399 | -1.785 | 0.00 | 0.00 | -0.100 | HD |
| ATOM            | 37 | H | LIG d 111 | 1.040  | 3.634  | 1.024  | 0.00 | 0.00 | -0.081 | HD |
| ENDBRANCH 15 16 |    |   |           |        |        |        |      |      |        |    |
| ENDBRANCH 14 15 |    |   |           |        |        |        |      |      |        |    |
| ENDBRANCH 13 14 |    |   |           |        |        |        |      |      |        |    |
| ENDBRANCH 5 13  |    |   |           |        |        |        |      |      |        |    |
| BRANCH 4 38     |    |   |           |        |        |        |      |      |        |    |
| ATOM            | 38 | O | LIG d 111 | -2.554 | 8.435  | 1.079  | 0.00 | 0.00 | -0.704 | OA |
| ATOM            | 39 | H | LIG d 111 | -3.408 | 8.139  | 1.410  | 0.00 | 0.00 | 0.439  | HD |
| ENDBRANCH 4 38  |    |   |           |        |        |        |      |      |        |    |
| TORSDOF 8       |    |   |           |        |        |        |      |      |        |    |

### 3:

REMARK 8 active torsions:

REMARK status: ('A' for Active; 'I' for Inactive)

REMARK 1 A between atoms: O\_12 and C\_1  
REMARK 2 A between atoms: O\_11 and C\_2  
REMARK 3 A between atoms: O\_10 and C\_3  
REMARK 4 A between atoms: C\_4 and O\_9  
REMARK 5 A between atoms: C\_5 and C\_6  
REMARK 6 A between atoms: C\_6 and O\_8  
REMARK 7 A between atoms: C\_17 and O\_8  
REMARK 8 A between atoms: C\_17 and C\_18  
REMARK I between atoms: C\_19 and B\_20  
REMARK I between atoms: B\_21 and B\_27  
REMARK I between atoms: B\_24 and B\_23  
REMARK I between atoms: B\_24 and B\_29  
REMARK I between atoms: B\_24 and B\_25  
REMARK I between atoms: B\_25 and B\_29  
REMARK I between atoms: B\_25 and B\_27  
REMARK I between atoms: B\_26 and B\_29

ROOT

|      |   |   |           |       |       |        |      |      |        |    |
|------|---|---|-----------|-------|-------|--------|------|------|--------|----|
| ATOM | 1 | C | LIG d 111 | 5.108 | 2.350 | -3.011 | 0.00 | 0.00 | 0.291  | C  |
| ATOM | 2 | C | LIG d 111 | 6.205 | 3.368 | -3.319 | 0.00 | 0.00 | 0.298  | C  |
| ATOM | 3 | C | LIG d 111 | 6.730 | 3.926 | -2.011 | 0.00 | 0.00 | 0.315  | C  |
| ATOM | 4 | C | LIG d 111 | 5.591 | 4.517 | -1.198 | 0.00 | 0.00 | 0.250  | C  |
| ATOM | 5 | C | LIG d 111 | 4.509 | 3.456 | -1.000 | 0.00 | 0.00 | 0.164  | C  |
| ATOM | 6 | O | LIG d 111 | 4.070 | 2.986 | -2.281 | 0.00 | 0.00 | -0.355 | OA |

ENDROOT

BRANCH 1 7

|      |   |   |           |       |       |        |      |      |        |    |
|------|---|---|-----------|-------|-------|--------|------|------|--------|----|
| ATOM | 7 | O | LIG d 111 | 4.575 | 1.755 | -4.155 | 0.00 | 0.00 | -0.388 | OA |
| ATOM | 8 | C | LIG d 111 | 3.857 | 2.628 | -5.033 | 0.00 | 0.00 | 0.219  | C  |

ENDBRANCH 1 7

BRANCH 2 9

|      |    |   |           |       |       |        |      |      |        |    |
|------|----|---|-----------|-------|-------|--------|------|------|--------|----|
| ATOM | 9  | O | LIG d 111 | 7.296 | 2.757 | -3.997 | 0.00 | 0.00 | -0.691 | OA |
| ATOM | 10 | H | LIG d 111 | 6.927 | 2.190 | -4.687 | 0.00 | 0.00 | 0.406  | HD |

ENDBRANCH 2 9

BRANCH 3 11

|      |    |   |           |       |       |        |      |      |        |    |
|------|----|---|-----------|-------|-------|--------|------|------|--------|----|
| ATOM | 11 | O | LIG d 111 | 7.685 | 4.965 | -2.204 | 0.00 | 0.00 | -0.711 | OA |
|------|----|---|-----------|-------|-------|--------|------|------|--------|----|

ATOM 12 H LIG d 111 8.405 4.604 -2.735 0.00 0.00 0.436 HD  
 ENDBRANCH 3 11  
 BRANCH 5 13  
 ATOM 13 C LIG d 111 3.306 4.007 -0.259 0.00 0.00 0.294 C  
 BRANCH 13 14  
 ATOM 14 O LIG d 111 2.428 2.997 0.221 0.00 0.00 -0.272 OA  
 BRANCH 14 15  
 ATOM 15 C LIG d 111 1.526 2.510 -0.750 0.00 0.00 -0.042 C  
 BRANCH 15 16  
 ATOM 16 C LIG d 111 0.738 1.355 -0.166 0.00 0.00 0.513 A  
 ATOM 17 B LIG d 111 0.780 -0.168 -0.922 0.00 0.00 0.004 B  
 ATOM 18 H LIG d 111 1.501 -0.273 -1.850 0.00 0.00 -0.076 HD  
 ATOM 19 B LIG d 111 -0.619 0.894 -1.099 0.00 0.00 -0.053 B  
 ATOM 20 B LIG d 111 0.430 -1.322 0.364 0.00 0.00 0.020 B  
 ATOM 21 B LIG d 111 -0.858 -0.812 -0.754 0.00 0.00 0.089 B  
 ATOM 22 B LIG d 111 1.462 0.084 0.691 0.00 0.00 0.000 B  
 ATOM 23 H LIG d 111 -0.845 1.544 -2.056 0.00 0.00 -0.056 HD  
 ATOM 24 B LIG d 111 -1.839 0.403 0.085 0.00 0.00 0.049 B  
 ATOM 25 C LIG d 111 -0.756 1.656 0.419 0.00 0.00 0.163 A  
 ATOM 26 H LIG d 111 -2.961 0.689 -0.136 0.00 0.00 -0.070 HD  
 ATOM 27 B LIG d 111 -1.191 -0.972 0.990 0.00 0.00 -0.048 B  
 ATOM 28 B LIG d 111 -1.160 0.646 1.705 0.00 0.00 0.067 B  
 ATOM 29 H LIG d 111 -1.908 -1.807 1.417 0.00 0.00 -0.082 HD  
 ATOM 30 B LIG d 111 0.249 -0.414 1.883 0.00 0.00 0.089 B  
 ATOM 31 B LIG d 111 0.480 1.293 1.534 0.00 0.00 -0.008 B  
 ATOM 32 H LIG d 111 0.563 -0.845 2.937 0.00 0.00 -0.103 HD  
 ATOM 33 H LIG d 111 0.908 2.171 2.185 0.00 0.00 -0.086 HD  
 ATOM 34 H LIG d 111 -1.834 1.091 2.564 0.00 0.00 -0.079 HD  
 ATOM 35 H LIG d 111 0.887 -2.412 0.338 0.00 0.00 -0.096 HD  
 ATOM 36 H LIG d 111 -1.329 -1.518 -1.576 0.00 0.00 -0.103 HD  
 ATOM 37 H LIG d 111 2.630 0.119 0.839 0.00 0.00 -0.090 HD  
 ENDBRANCH 15 16  
 ENDBRANCH 14 15  
 ENDBRANCH 13 14

```

ENDBRANCH 5 13
BRANCH 4 38
ATOM 38 O LIG d 111 6.044 4.937 0.079 0.00 0.00 -0.684 OA
ATOM 39 H LIG d 111 6.865 5.426 -0.067 0.00 0.00 0.428 HD
ENDBRANCH 4 38
TORSDOF 8

```

#### **4. Characterization of the GLUT1 function and additional details related to affinity/uptake studies**

The GLUT1 function of the CAL 27 cells were characterized with the known GLUT1 substrate [<sup>14</sup>C]-D-glucose under different conditions. First, the time-dependent uptake was determined in order to find the optimal incubation time for the uptake of [<sup>14</sup>C]-D-glucose. The CAL 27 cells (passages 7–20) were seeded at the density of  $5 \times 10^5$  cells/wells onto 24-well plates. The cells were used in the characterization studies two days after seeding.

The cells were washed with pre-warmed HBSS containing NaCl (125 mM), KCl (4.8 mM), MgSO<sub>4</sub> (1.2 mM), KH<sub>2</sub>PO<sub>4</sub> (1.3 mM), CaCl<sub>2</sub> (1.3 mM), glucose (5.6 mM) and HEPES (25 mM) adjusted to pH 7.4 with 1 M NaOH and the cells were pre-incubated for ten min. before the experiments. To study the time-dependent uptake of [<sup>14</sup>C]-D-glucose, the cells were incubated at 10 different time points (0.5–60 min, n = 4) with 250 µl of HBSS including 1.8 µM (0.1 mCi/ml) of [<sup>14</sup>C]-D-glucose. After incubation, the experiment was stopped through the addition of 500 µl of ice-cold HBSS and the cells were washed twice with ice-cold HBSS (500 µL). The cells were then lysed with 250 µl of 0.1 M NaOH and further lysed for an additional 60 min. The lysate was mixed with 1.0 ml of Emulsifier safe cocktail (PerkinElmer, Waltham, MA, USA) and the radioactivity was measured by liquid scintillation counter (MicroBeta<sup>2</sup> counter, PerkinElmer, Waltham, MA, USA). The optimal incubation time was determined from the linear range of the time-dependent uptake curve and was found to be 5 min. which was used in further characterization studies (*i.e.* in studies set to determine the concentration-, pH-, Na<sup>+</sup>- and temperature-dependency).

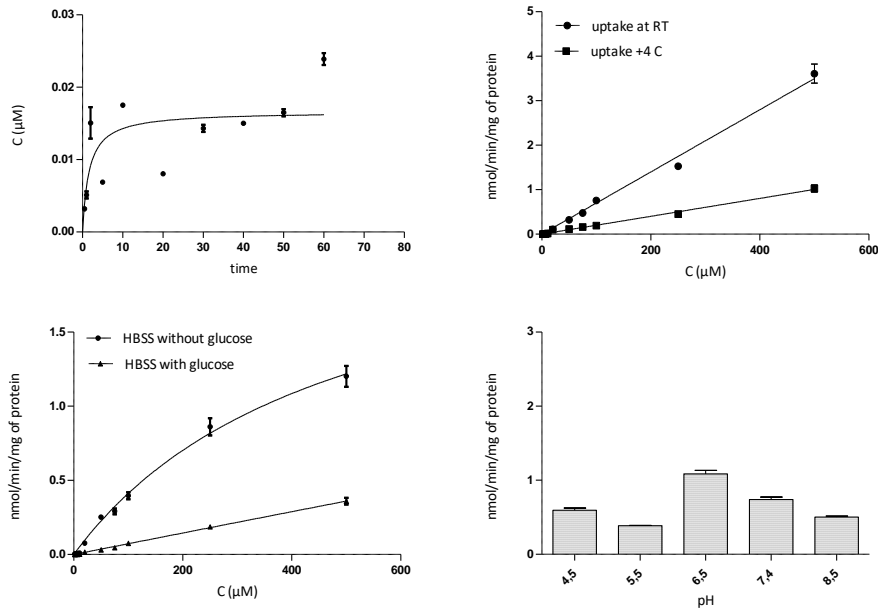

**Supplementary figure 43.** Characterization of GLUT1 function in the CAL 27 cell line.

In the uptake experiments, the cell culture protocol described above was used with the exception of certain changes in incubation buffers and conditions. In order to determine the concentration-dependency, D-glucose was used at concentrations ranging from 1.8–500  $\mu\text{M}$  in the HBSS buffer described above and in HBSS buffer without additional glucose. The uptake was significantly higher without additional glucose and therefore the HBSS buffer without glucose was selected for further studies. The effect of temperature was studied using an ice bath at +4  $^{\circ}\text{C}$ , with the same D-glucose concentrations (1.8–500  $\mu\text{M}$ ) mixed with ice-cold HBSS buffer (without additional glucose). The glucose uptake was then determined in glucose and  $\text{Na}^+$ -free buffer, by replacing  $\text{NaCl}$  with equimolar amounts of choline chloride (125 mM). Finally, the uptake was studied under different pH conditions (pH 4.5, 5.5, 6.5, 7.4 and 8.5). HEPES was replaced with MES (2-(*N*-morpholino)ethanesulfonic acid) in order to reach a more acidic pH.

## Ability of compounds to bind to GLUT1

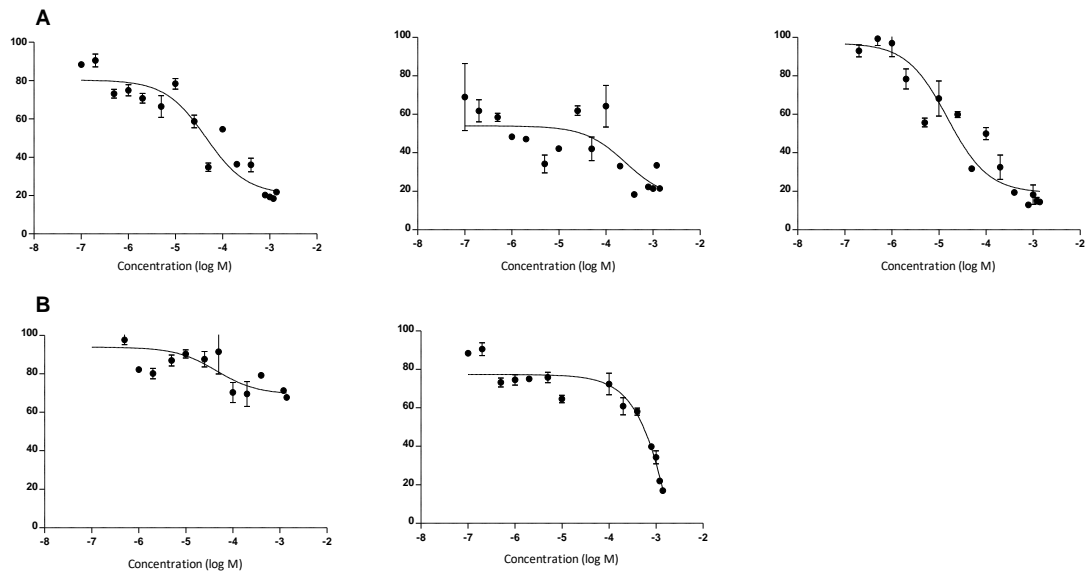

**Supplementary figure 44.** Inhibition of [<sup>14</sup>C]-D-glucose (1.8 μM) uptake in CAL 27 cells in the presence of 0.1–1800 μM concentrations of glucoconjugates **1** (left), **2** (middle), **3** (right) (row **A**), BPA (left) and BSH (right) (row **B**).
